# Supplementary material for: Reduction of highly bulky triphenolamine molybdenum nitrido and chloride complexes
Source: Royal Society of Chemistry journal article supplement (doi:10.1039/d1dt02375f), 2021-01-01
Supplement: d1dt02375f1.pdf [file d1dt02375f1.pdf]

## Supporting Information

### ***Reduction of highly bulky triphenolamine molybdenum nitrido and chloride complexes***

Dae Young Bae,<sup>a</sup> Gunhee Lee<sup>a</sup> and Eunsung Lee\*<sup>a</sup>

<sup>a</sup> Department of Chemistry, Pohang University of Science and Technology, Pohang, 37673, Republic of Korea

\* E-mail: [eslee@postech.ac.kr](mailto:eslee@postech.ac.kr)

## Table of contents

|                                              |     |
|----------------------------------------------|-----|
| Materials and Methods                        | S1  |
| Experimental Section                         | S2  |
| Synthesis of Molybdenum Complexes            | S2  |
| Standard Reduction Protocol                  | S4  |
| Ammonia Quantification                       | S5  |
| Calibration Curve for Ammonia Quantification | S7  |
| X-ray Crystallographic Analysis              | S8  |
| General information                          | S8  |
| Crystal data and structure refinements       | S9  |
| IR spectra of metal complexes                | S12 |
| UV-Vis spectra of metal complexes            | S14 |
| DFT                                          | S16 |
| Electron Paramagnetic Resonance (EPR) Data   | S35 |
| NMR Data                                     | S36 |

## Materials and Methods

All air- and moisture-sensitive manipulations were performed using oven-dried or flame-dried glassware, including basic Schlenk and glovebox techniques under N<sub>2</sub> atmosphere. Air- and moisture-insensitive reactions were carried out under an ambient atmosphere and magnetically stirred. Benzene, benzene-*d*<sub>6</sub>, diethyl ether, toluene, and THF were distilled from deep purple sodium benzophenone ketyl. Ligand **1**,<sup>1</sup> NMo(NMe<sub>2</sub>)<sub>3</sub>,<sup>2</sup> [LutH]OTf,<sup>3</sup> MoCl<sub>4</sub>(THF)<sub>2</sub>,<sup>4</sup> and KC<sub>8</sub><sup>5</sup> were prepared following the literature procedure. All deuterated solvents were purchased from Aldrich and Cambridge Isotope Laboratories. Unless stated otherwise, all other chemicals were used as received. NMR spectra were recorded on a Bruker DRX 500 spectrometer operating at 500 MHz and 125 MHz for <sup>1</sup>H and <sup>13</sup>C acquisitions, respectively. <sup>1</sup>H chemical shifts were referenced to the residual proton solvent peaks (C<sub>6</sub>D<sub>6</sub>, δ 7.16) and <sup>13</sup>C solvent signals (C<sub>6</sub>D<sub>6</sub>, δ 128.06). Signals are listed in ppm, and multiplicity identified as s = singlet, br = broad, d = doublet, t = triplet, m = multiplet; coupling constants in Hz; integration. Purified compounds were further dried under high vacuum (~ 10<sup>-3</sup> Torr). Yields refer to purified and spectroscopically pure compounds. Solution state magnetic susceptibility was measured by Evans' method<sup>6,7</sup> on a Bruker DRX 500 spectrometers in benzene-*d*<sub>6</sub> at 297 K. UV-vis spectra were recorded using an Agilent Technologies Cary 6000i UV-Vis-NIR spectrometer. Samples were prepared under N<sub>2</sub> in a sealed 1 cm path length cuvette. Infrared spectra were obtained as thin films formed by evaporation of solutions on KBr windows using a Bruker Alpha system.

## Experimental Section

### Synthesis of Molybdenum Complexes

#### Molybdenum(VI) Nitrido Complex (A)

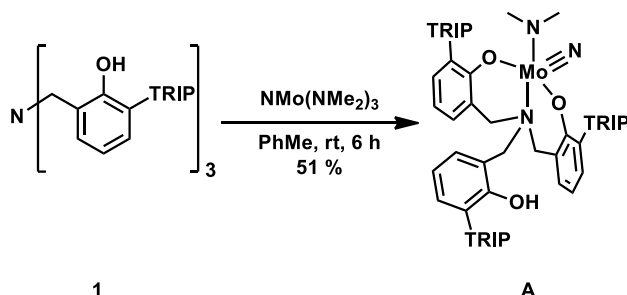

$\text{NMo}(\text{NMe}_2)_3$  (55.3 mg, 0.23 mmol, 1.05 equiv.) and **1** (205.1 mg, 0.218 mmol, 1.0 equiv.) were added to a 20 mL vial. Dry toluene (2.5 mL) was added to the vial. The resulting mixture was stirred at +23 °C for 12 hours. The volatiles were removed *in vacuo*. The solid residue was extracted with ether (3 x 1 mL). The mixture was filtered through a pad of Celite, concentrated *in vacuo*, leading to precipitation of yellow microcrystals, and had stood at -20 °C for several days. The product was rinsed with a small amount of cold ether (3 x 0.5 mL) and dried *in vacuo* at +23 °C to obtain **A** as yellow solid (120.3 mg, 51%). NMR Spectroscopy:  $^1\text{H}$  NMR (500 MHz,  $\text{C}_6\text{D}_6$ , 23 °C,  $\delta$ ): 7.35–7.18 (m, 3H), 7.15–6.72 (m, 12H), 5.02 (d,  $J = 14.9$  Hz, 2H), 4.47 (s, 1H), 4.43 (s, 2H), 3.95 (s, 3H), 3.77 (d,  $J = 15.2$  Hz, 2H), 3.19 (sept,  $J = 6.9$  Hz, 2H), 2.94 (sept,  $J = 6.7$  Hz, 2H), 2.83 (sept,  $J = 6.9$  Hz, 3H), 2.73 (sept,  $J = 6.9$  Hz, 2H), 2.58 (s, 3H), 1.32 (d,  $J = 6.9$  Hz, 6H), 1.26 (d,  $J = 6.9$  Hz, 6H), 1.25–1.16 (m, 30H), 1.09 (t,  $J = 7.5$  Hz, 12H).  $^{13}\text{C}$  NMR (125 MHz,  $\text{C}_6\text{D}_6$ , 23 °C,  $\delta$ ): 159.4, 153.6, 150.3, 148.7, 147.9, 147.6, 147.4, 135.0, 134.2, 131.8, 131.4, 130.7, 129.8, 129.2, 127.2, 122.6, 121.9, 120.1, 120.03, 119.95, 119.3, 118.1, 62.2, 61.0, 46.6, 44.6, 34.9, 34.7, 31.2, 31.1, 31.0, 24.8, 24.7, 24.68, 24.6, 24.4, 24.38, 24.3, 24.27, 24.2, 24.1. IR (KBr,  $\text{cm}^{-1}$ ): 3528 (s, O–H) 2957 (s, C–H), 2865 (s, C–H), 1584 (m), 1438 (m), 1245 (s), 1045 (s, Mo–N), 861 (m), 690 (m). Anal. Calcd. for  $\text{C}_{69}\text{H}_{92}\text{MoN}_3\text{O}_3$ : C, 74.25; H, 8.00; N, 4.01; found: C, 74.83; H, 8.37; N, 4.33.

#### Molybdenum(III) Amino Complex (B)

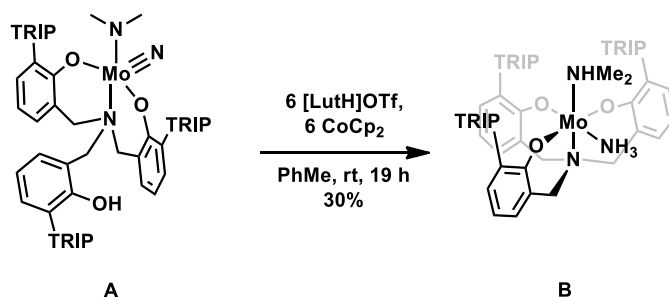

**A** (100.0 mg, 0.091 mmol, 1.0 equiv.) and  $[\text{LutH}]\text{OTf}$  (141.0 mg, 0.548 mmol, 6.0 equiv.) were added to a 20 mL vial. Dry toluene (4 mL) was added to the vial. The resulting mixture was stirred at +23 °C for 5 minutes followed by the addition of  $\text{CoCp}_2$  (104.0 mg, 0.548 mmol, 6.0

equiv.) to the vial. The mixture was stirred for 19 hours and the volatiles were removed *in vacuo*. The solid residue was extracted with pentane ( $3 \times 1$  mL). The solution was filtered through a pad of Celite, concentrated *in vacuo*, leading to precipitation of reddish-yellow microcrystals, and had stood at  $-40$  °C for several days. The product was rinsed with a small amount of cold pentane ( $3 \times 0.5$  mL) and dried *in vacuo* at  $+23$  °C to obtain **B** as reddish-yellow solid (30.0 mg, 30%). IR (KBr,  $\text{cm}^{-1}$ ): 3356 (s (w), N–H), 3242 (s (w), N–H), 2954 (s, C–H), 2926 (s, C–H), 2863 (s, C–H), 2737 (s), 1580 (m), 1427 (s), 1262 (s), 754 (m). Anal. Calcd. for  $\text{C}_{68}\text{H}_{94}\text{MoN}_3\text{O}_3 \cdot (\text{H}_2\text{O})$ : C, 73.22; H, 8.67; N, 3.77; found: C, 72.85; H, 8.37; N, 3.24. Solution magnetic moment ( $\text{C}_6\text{D}_6$ ):  $3.52 \mu_{\text{B}}$ .

### Molybdenum(IV) Chloro THF Complex (C)

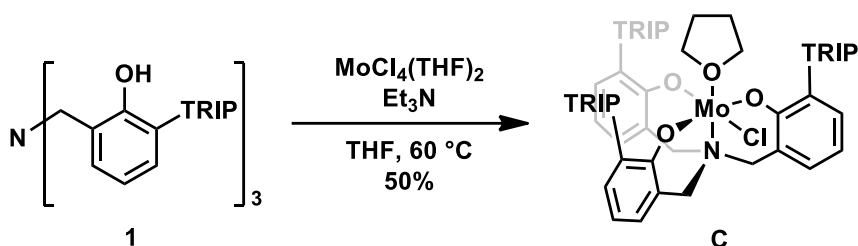

$\text{Et}_3\text{N}$  (49.0  $\mu\text{L}$ , 3.3 equiv.) and **1** (100.0 mg, 1.0 equiv.) were added to a 4 mL vial. Dry THF (10 mL) was added to the vial. The resulting mixture was stirred at  $+23$  °C for 30 minutes.  $\text{MoCl}_4(\text{THF})_2$  (45.0 mg, 1.1 equiv.) was added to the vial. The mixture was stirred at  $+60$  °C for 24 hours. The solvents were removed *in vacuo*. The solid residue was extracted with pentane ( $4 \times 3$  mL). The mixture was filtered through a pad of Celite, concentrated *in vacuo*, leading to precipitation of microcrystals, which were isolated by filtration after the mixture, and had stood at  $-20$  °C for several days. The product was rinsed with a small amount of cold pentane ( $3 \times 1$  mL) and dried for 8 h at  $+23$  °C to afford **C** as red solid (60.2 mg, 50%). IR (KBr,  $\text{cm}^{-1}$ ): 2965 (s, C–H), 2863 (s, C–H), 1581 (m), 1430 (m), 1233 (s), 853 (m), 759 (s). Anal. Calcd. For  $\text{C}_{70}\text{H}_{92}\text{ClMoNO}_4 \cdot (\text{H}_2\text{O})_{0.8}$ : C, 72.65; H, 8.15; N, 1.21; found: C, 72.35; H, 7.78; N, 0.97. Solution magnetic moment ( $\text{C}_6\text{D}_6$ ):  $3.03 \mu_{\text{B}}$ .

### Molybdenum(III) KCl Dimer (D)

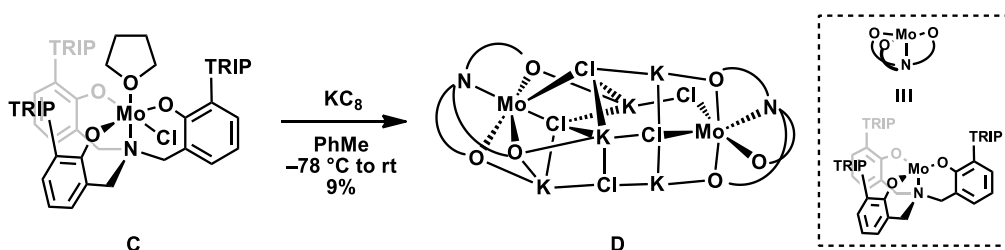

**C** (50.0 mg, 0.044 mmol, 1.0 equiv.) and  $\text{KC}_8$  (6.5 mg, 0.048 mmol, 1.1 equiv.) were added to a 20 mL vial. Dry toluene (5 mL) was added to the vial. The resulting mixture was stirred at  $-78$  °C a coldwell for 12 hours. Then the mixture stirred 5 hours more at  $+23$  °C. The solvents were removed *in vacuo*. The solid residue was extracted with pentane ( $4 \times 3$  mL). The mixture was filtered through a pad of Celite, concentrated *in vacuo*, leading to precipitation of microcrystals and had stood at  $-40$  °C for two weeks. The crystalline product was rinsed with

a small amount of cold pentane and dried for 12 h at +23 °C to afford **D** as yellow solid (10.0 mg, 9%). IR (KBr,  $\text{cm}^{-1}$ ): 3030 (s, C–H), 2957 (s, C–H), 2863 (s, C–H), 1591 (m), 1435 (m), 1243 (m), 1071 (m), 754 (m). Anal. Calcd. For  $\text{C}_{132}\text{H}_{168}\text{Cl}_5\text{K}_5\text{Mo}_2\text{N}_2\text{O}_6(\text{C}_7\text{H}_8)_4$ : C, 68.34; H, 7.17; N, 1.00; found: C, 68.87; H, 7.53; N, 1.31. Solution magnetic moment ( $\text{C}_6\text{D}_6$ ): 3.76  $\mu_B$ .

## Standard Reduction Protocol

In a nitrogen atmosphere glovebox, the complex (~10.0 mg, ~9.14  $\mu\text{mol}$ ) weighed into a 50 mL Schlenk flask. The 48 equivalents of proton sources and 36 equivalents of electron sources were added in the same flask, containing a magnetic stirring bar. The flask is cooled to 77 K in a cold well using liquid nitrogen. The solvent is added to the flask 4 mL to make the concentration of the solution ~2.3 mM. The reaction system is maintained in the cold well for 5 minutes before transferring to a dry ice/acetone bath outside of the glovebox. The reaction solution was stirred in the cold bath for 5 hours at  $-78$  °C. Then the flask was removed from the bath.

## Hydrolysis of molybdenum nitride complex A

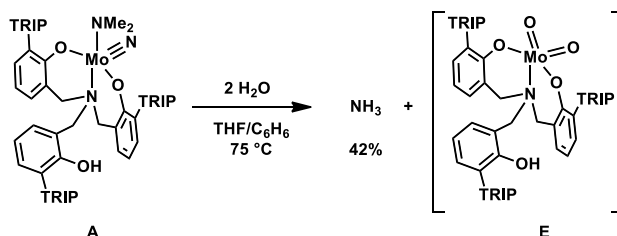

In a nitrogen atmosphere glovebox, complex **A** (5.5 mg, 5.03  $\mu\text{mol}$ ) weighed into a JY NMR tube and 600  $\mu\text{L}$  of  $\text{C}_6\text{H}_6$  was added. A stock solution of water in THF (10  $\mu\text{L}$  of water in 10 mL of THF) was prepared outside of the glovebox. 360  $\mu\text{L}$  of the solution was transferred to the tube. The solution was heated at 75 °C for 6 hours. The quantification of the synthesized ammonia was proceeded with below the **Ammonia Quantification** method. The yield of ammonia was 42% by  $^1\text{H-NMR}$  using 1,3,5-trimethoxybenzene as an internal standard. After vacuum transfer for the ammonia quantification, the residual yellow solid measured for ESI-MS (negative mode) by dissolving  $\text{C}_6\text{H}_6/\text{MeCN}$  solution whose  $m/z$  value was in accordance with molybdenum dioxo complex **E**.

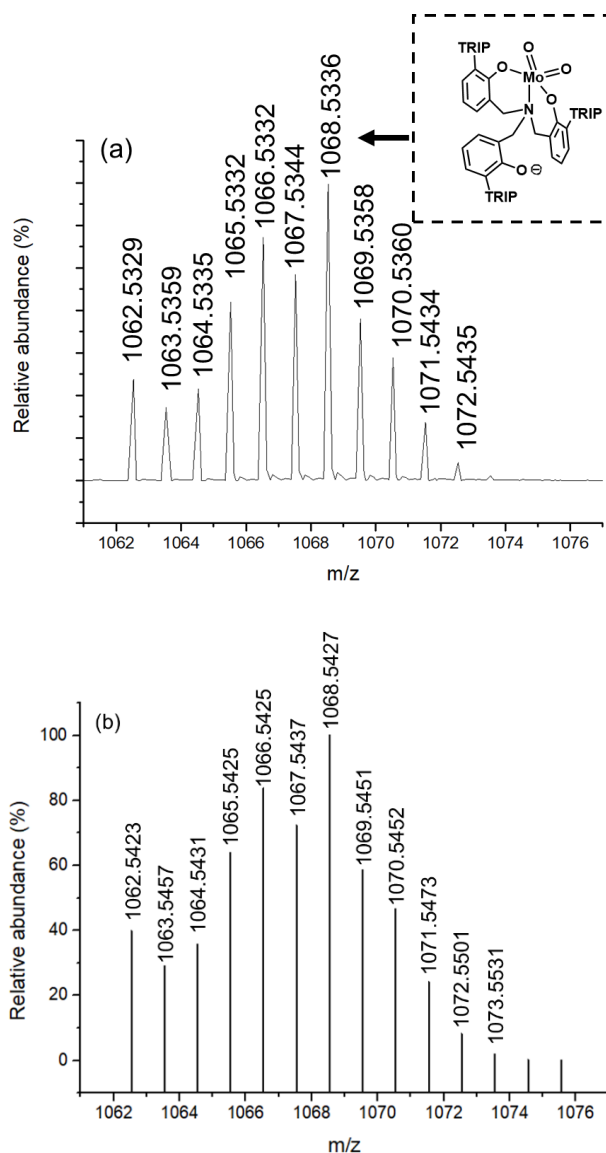

**Figure S1.** (a) Observed mass spectrum and (b) calculated isotopic pattern of molybdenum dioxo complex **I**

### Ammonia Quantification

A Schlenk flask was filled with 3 mL of 2.0 M HCl in diethyl ether to collect  $\text{NH}_3$ . A glass vacuum transfer apparatus was attached to a high-vacuum ( $< 10^{-3}$  Torr) line. The reaction mixture flask and the collection (3 mL of 2.0 M HCl in diethyl ether) flask were connected with the apparatus, and then both of them were placed in liquid nitrogen for 15 minutes. The headspace of the apparatus was evacuated for 15 minutes, by maintaining the line pressure under high-vacuum ( $< 10^{-3}$  Torr). The mixture was thawed and the remaining volatiles were vacuum-transferred to the collection flask under static vacuum. After the vacuum-transfer, the reaction flask was taken into the  $\text{N}_2$  glovebox. To the solid residue in the reaction flask, 40 mg of potassium *tert*-butoxide in MeOH/THF (4 mL/ 2 mL) was added. The flask was taken out

from the glovebox and attached to the vacuum transfer apparatus. The homogeneous solution was stirred for 15 minutes and the volatiles of the solution were vacuum-transferred to the collection flask. All volatiles of the collection flask were removed under dynamic vacuum at room temperature. The remaining solid including ammonium chloride in the flask was dissolved in 1 mL of H<sub>2</sub>O. The amount of ammonia was quantified by the indophenol method using an aliquot of the solution (20  $\mu$ L). The indophenol absorbance was calibrated using sublimed NH<sub>4</sub>Cl within the range of 0.035 to 2.49, and all the sample absorbance data were interpolated in that region. In the case of runs with PhNH<sub>3</sub>OTf, the anilinium salt in a collection flask could interfere with the indophenol method. The quantification for ammonia was conducted by integrating <sup>1</sup>H-NMR peaks. The solid residue of the collection flask was extracted into 1 mL of DMSO-*d*<sub>6</sub> solvent, which contains 0.67 mmol of 1,3,5-trimethoxybenzene as an internal standard. Ammonium peaks in <sup>1</sup>H-NMR were integrated against the two peaks of the internal standard for quantification of ammonium.

| entry            | Complex | H <sup>+</sup>                         | e <sup>-</sup>     | Solvent           | NH <sub>3</sub> /Mo |
|------------------|---------|----------------------------------------|--------------------|-------------------|---------------------|
| 1                | A       | [LutH]OTf                              | CoCp <sub>2</sub>  | PhMe              | 0.95                |
| 2                | A       | Ph <sub>2</sub> NH <sub>2</sub> OTf    | CoCp* <sub>2</sub> | Diethyl ether     | 0.64                |
| 3 <sup>a</sup>   | A       | PhNH <sub>3</sub> OTf                  | CoCp* <sub>2</sub> | Diethyl ether     | 0.54                |
| 4 <sup>a,b</sup> | A       | PhNH <sub>3</sub> OTf                  | CoCp* <sub>2</sub> | Diethyl ether     | 0.58                |
| 5                | A       | ethylene glycol                        | SmI <sub>2</sub>   | THF               | 0.22                |
| 6                | A       | [Cy <sub>3</sub> PH][BF <sub>4</sub> ] | KC <sub>8</sub>    | Et <sub>2</sub> O | 0.28                |
| 7 <sup>c</sup>   | C       | [LutH]OTf                              | CoCp* <sub>2</sub> | PhMe              | 0.06                |
| 8                | C       | [LutH]OTf                              | CoCp <sub>2</sub>  | PhMe              | 0.11                |

<sup>a</sup>: The synthesized ammonium was quantified by the integration of <sup>1</sup>H-NMR peaks of ammonium against the internal standard.

<sup>b</sup>: The reaction was done in Ar atmosphere.

<sup>c</sup>: The reaction was done in rt.



### Calibration Curve for Ammonia Quantification

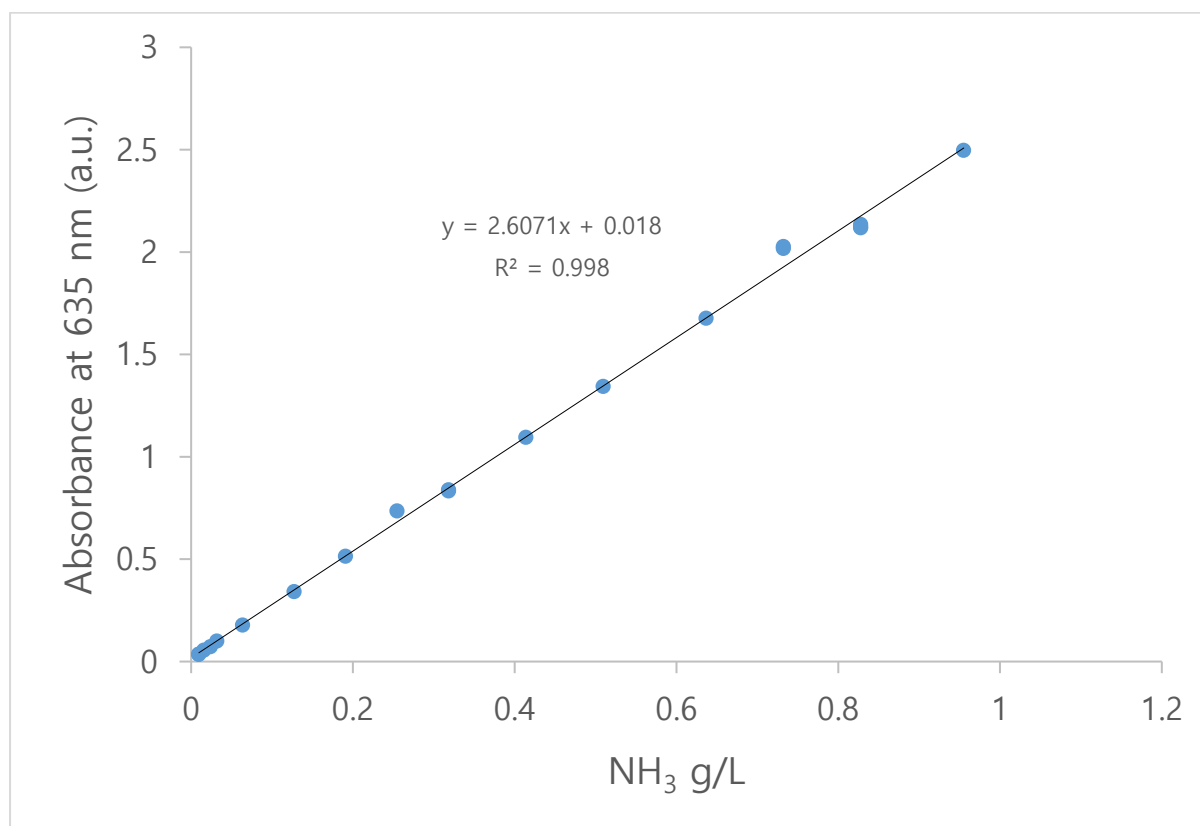

**Figure S2.** Calibration curve for NH<sub>3</sub> UV-VIS quantification

## **X-ray Crystallographic Analysis**

CCDC 1991108- 1991111 contains the supplementary crystallographic data for **A**, **B**, **C**, and **D**. These data can be obtained free of charge via [www.ccdc.cam.ac.uk/cgi-bin/catreq.cgi](http://www.ccdc.cam.ac.uk/cgi-bin/catreq.cgi) (or from the Cambridge Crystallographic Data Centre, 12, Union Road, Cambridge CB21EZ, UK; fax (+44) 1223-336-033; or [deposit@ccdc.cam.ac.uk](mailto:deposit@ccdc.cam.ac.uk)).

### **General information**

A suitable crystal was coated with paratone-N oil and the diffraction data measured at 100 K either with synchrotron radiation on a 2D (for **B**), 6D (for **A** and **C**), or 11C (for **D**) beamline at the Pohang Accelerator Laboratory, Korea. Using Olex2 software, the structure was solved by ShelXT using Intrinsic Phasing and refined by ShelXL using Least Squares minimization. All the non-hydrogen atoms were refined anisotropically. All hydrogen atoms were added to their geometrically ideal positions.

## Crystal data and structure refinements

### Crystal data and structure refinement for A

|                                             |                                                                  |
|---------------------------------------------|------------------------------------------------------------------|
| Empirical formula                           | C <sub>72</sub> H <sub>101</sub> MoN <sub>3</sub> O <sub>4</sub> |
| Formula weight                              | 1168.49                                                          |
| Temperature/K                               | 100                                                              |
| Crystal system                              | monoclinic                                                       |
| Space group                                 | C2/c                                                             |
| a/Å                                         | 39.948(8)                                                        |
| b/Å                                         | 9.4800(19)                                                       |
| c/Å                                         | 36.213(7)                                                        |
| α/°                                         | 90                                                               |
| β/°                                         | 99.22(3)                                                         |
| γ/°                                         | 90                                                               |
| Volume/Å <sup>3</sup>                       | 13537(5)                                                         |
| Z                                           | 8                                                                |
| ρ <sub>calc</sub> /cm <sup>3</sup>          | 1.147                                                            |
| μ/mm <sup>-1</sup>                          | 0.188                                                            |
| F(000)                                      | 5024.0                                                           |
| Crystal size/mm <sup>3</sup>                | 0.05 × 0.03 × 0.03                                               |
| Radiation                                   | Synchrotron (λ = 0.660)                                          |
| 2θ range for data collection/°              | 2.116 to 66.124                                                  |
| Index ranges                                | -65 ≤ h ≤ 65, -15 ≤ k ≤ 15, -59 ≤ l ≤ 59                         |
| Reflections collected                       | 89521                                                            |
| Independent reflections                     | 27164 [R <sub>int</sub> = 0.0968, R <sub>sigma</sub> = 0.0708]   |
| Data/restraints/parameters                  | 27164/0/745                                                      |
| Goodness-of-fit on F <sup>2</sup>           | 1.144                                                            |
| Final R indexes [I ≥ 2σ (I)]                | R <sub>1</sub> = 0.0655, wR <sub>2</sub> = 0.1926                |
| Final R indexes [all data]                  | R <sub>1</sub> = 0.0757, wR <sub>2</sub> = 0.2003                |
| Largest diff. peak/hole / e Å <sup>-3</sup> | 1.75/-1.16                                                       |

### Crystal data and structure refinement for B

|                                    |                                                                 |
|------------------------------------|-----------------------------------------------------------------|
| Empirical formula                  | C <sub>68</sub> H <sub>94</sub> MoN <sub>3</sub> O <sub>3</sub> |
| Formula weight                     | 1097.40                                                         |
| Temperature/K                      | 100                                                             |
| Crystal system                     | monoclinic                                                      |
| Space group                        | P21/c                                                           |
| a/Å                                | 21.558(4)                                                       |
| b/Å                                | 16.423(3)                                                       |
| c/Å                                | 18.064(4)                                                       |
| α/°                                | 90                                                              |
| β/°                                | 103.13(3)                                                       |
| γ/°                                | 90                                                              |
| Volume/Å <sup>3</sup>              | 6228(2)                                                         |
| Z                                  | 4                                                               |
| ρ <sub>calc</sub> /cm <sup>3</sup> | 1.170                                                           |
| μ/mm <sup>-1</sup>                 | 0.242                                                           |
| F(000)                             | 2356.0                                                          |
| Crystal size/mm <sup>3</sup>       | 0.2 × 0.1 × 0.06                                                |
| Radiation                          | Synchrotron (λ = 0.70000)                                       |

|                                                  |                                                              |
|--------------------------------------------------|--------------------------------------------------------------|
| 2 $\Theta$ range for data collection/ $^{\circ}$ | 4.536 to 48.666                                              |
| Index ranges                                     | $-25 \leq h \leq 25, -19 \leq k \leq 19, -21 \leq l \leq 21$ |
| Reflections collected                            | 27742                                                        |
| Independent reflections                          | 10192 [Rint = 0.0283, Rsigma = 0.0258]                       |
| Data/restraints/parameters                       | 10192/0/719                                                  |
| Goodness-of-fit on F <sup>2</sup>                | 1.059                                                        |
| Final R indexes [ $I \geq 2\sigma(I)$ ]          | R1 = 0.0422, wR2 = 0.1079                                    |
| Final R indexes [all data]                       | R1 = 0.0431, wR2 = 0.1086                                    |
| Largest diff. peak/hole / e $\text{\AA}^{-3}$    | 1.28/-0.74                                                   |

### Crystal data and structure refinement for C

|                                                  |                                                              |
|--------------------------------------------------|--------------------------------------------------------------|
| Empirical formula                                | C <sub>70</sub> H <sub>92</sub> ClMoNO <sub>4</sub>          |
| Formula weight                                   | 1142.83                                                      |
| Temperature/K                                    | 100.0                                                        |
| Crystal system                                   | monoclinic                                                   |
| Space group                                      | P21/c                                                        |
| a/ $\text{\AA}$                                  | 21.259(4)                                                    |
| b/ $\text{\AA}$                                  | 16.589(3)                                                    |
| c/ $\text{\AA}$                                  | 18.108(4)                                                    |
| $\alpha/^{\circ}$                                | 90                                                           |
| $\beta/^{\circ}$                                 | 102.74(3)                                                    |
| $\gamma/^{\circ}$                                | 90                                                           |
| Volume/ $\text{\AA}^3$                           | 6229(2)                                                      |
| Z                                                | 4                                                            |
| $\rho_{\text{calc}}/\text{cm}^3$                 | 1.219                                                        |
| $\mu/\text{mm}^{-1}$                             | 0.285                                                        |
| F(000)                                           | 2440.0                                                       |
| Crystal size/ $\text{mm}^3$                      | 0.05 $\times$ 0.05 $\times$ 0.03                             |
| Radiation                                        | Synchrotron ( $\lambda = 0.700$ )                            |
| 2 $\Theta$ range for data collection/ $^{\circ}$ | 3.096 to 60.01                                               |
| Index ranges                                     | $-30 \leq h \leq 30, -23 \leq k \leq 23, -25 \leq l \leq 25$ |
| Reflections collected                            | 67241                                                        |
| Independent reflections                          | 18922 [Rint = 0.0387, Rsigma = 0.0368]                       |
| Data/restraints/parameters                       | 18922/0/733                                                  |
| Goodness-of-fit on F <sup>2</sup>                | 1.071                                                        |
| Final R indexes [ $I \geq 2\sigma(I)$ ]          | R1 = 0.0572, wR2 = 0.1691                                    |
| Final R indexes [all data]                       | R1 = 0.0738, wR2 = 0.1798                                    |
| Largest diff. peak/hole / e $\text{\AA}^{-3}$    | 1.15/-1.37                                                   |

### Crystal data and structure refinement for D

|                   |                                                                                                                  |
|-------------------|------------------------------------------------------------------------------------------------------------------|
| Empirical formula | C <sub>144.5</sub> H <sub>198</sub> Cl <sub>5</sub> K <sub>5</sub> Mo <sub>2</sub> N <sub>2</sub> O <sub>6</sub> |
| Formula weight    | 2623.67                                                                                                          |
| Temperature/K     | 100                                                                                                              |
| Crystal system    | triclinic                                                                                                        |
| Space group       | P-1                                                                                                              |
| a/ $\text{\AA}$   | 18.820(4)                                                                                                        |
| b/ $\text{\AA}$   | 21.472(4)                                                                                                        |
| c/ $\text{\AA}$   | 23.757(5)                                                                                                        |
| $\alpha/^{\circ}$ | 111.84(3)                                                                                                        |
| $\beta/^{\circ}$  | 100.76(3)                                                                                                        |

|                                               |                                                              |
|-----------------------------------------------|--------------------------------------------------------------|
| $\gamma/^\circ$                               | 99.58(3)                                                     |
| Volume/ $\text{\AA}^3$                        | 8457(4)                                                      |
| Z                                             | 2                                                            |
| $\rho_{\text{calc}}/\text{cm}^3$              | 1.030                                                        |
| $\mu/\text{mm}^{-1}$                          | 0.314                                                        |
| F(000)                                        | 2782.0                                                       |
| Crystal size/ $\text{mm}^3$                   | $0.09 \times 0.08 \times 0.03$                               |
| Radiation                                     | Synchrotron ( $\lambda = 0.660$ )                            |
| $2\Theta$ range for data collection/ $^\circ$ | 2.368 to 54.56                                               |
| Index ranges                                  | $-26 \leq h \leq 26, -29 \leq k \leq 29, -32 \leq l \leq 32$ |
| Reflections collected                         | 75919                                                        |
| Independent reflections                       | 41484 [Rint = 0.0479, Rsigma = 0.0718]                       |
| Data/restraints/parameters                    | 41484/0/1513                                                 |
| Goodness-of-fit on $F^2$                      | 0.973                                                        |
| Final R indexes [ $I \geq 2\sigma(I)$ ]       | R1 = 0.0770, wR2 = 0.2162                                    |
| Final R indexes [all data]                    | R1 = 0.1237, wR2 = 0.2444                                    |
| Largest diff. peak/hole / $e \text{\AA}^{-3}$ | 1.76/-0.98                                                   |

## IR spectra of metal complexes

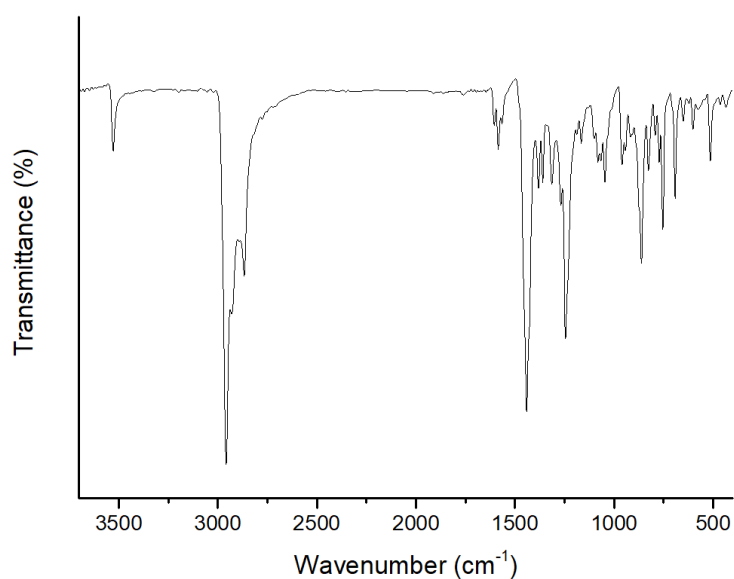

**Figure S3.** IR spectrum of **A**. IR (KBr,  $\text{cm}^{-1}$ ): 3528 (s, O–H) 2957 (s, C–H), 2865 (s, C–H), 1584 (m), 1438 (m), 1245 (s), 1045 (s, Mo–N), 861 (m), 690 (m).

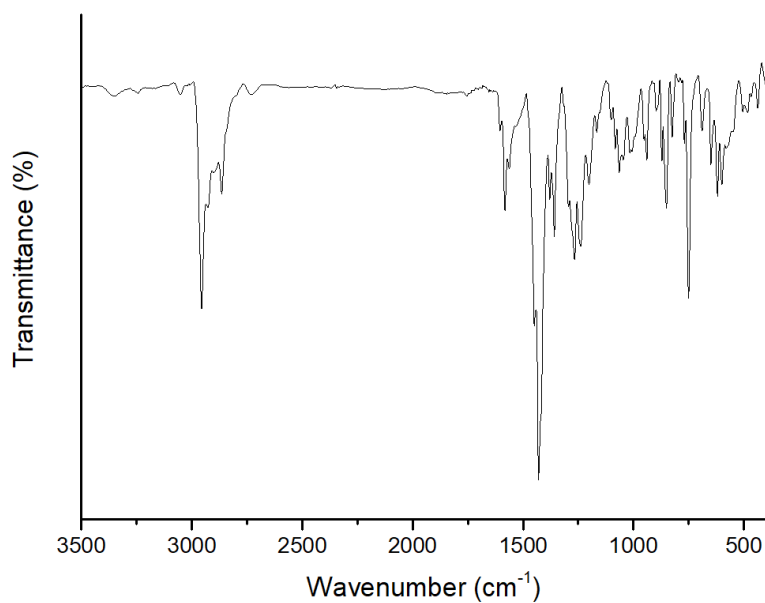

**Figure S4.** IR spectrum of **B**. IR (KBr,  $\text{cm}^{-1}$ ): 3356 (s (w), N–H), 3242 (s (w), N–H), 2954 (s, C–H), 2926 (s, C–H), 2863 (s, C–H), 2737 (s), 1580 (m), 1427 (s), 1262 (s), 754 (m).

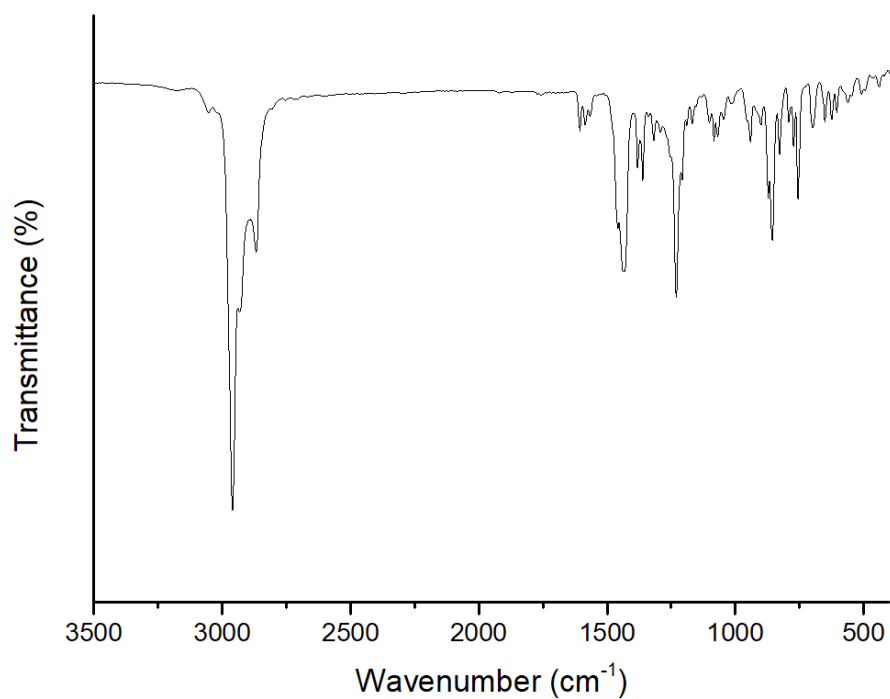

**Figure S5.** IR spectrum of **C**. IR (KBr,  $\text{cm}^{-1}$ ): 2965 (s, C–H), 2863 (s, C–H), 1581 (m), 1430 (m), 1233 (s), 853 (m), 759 (s).

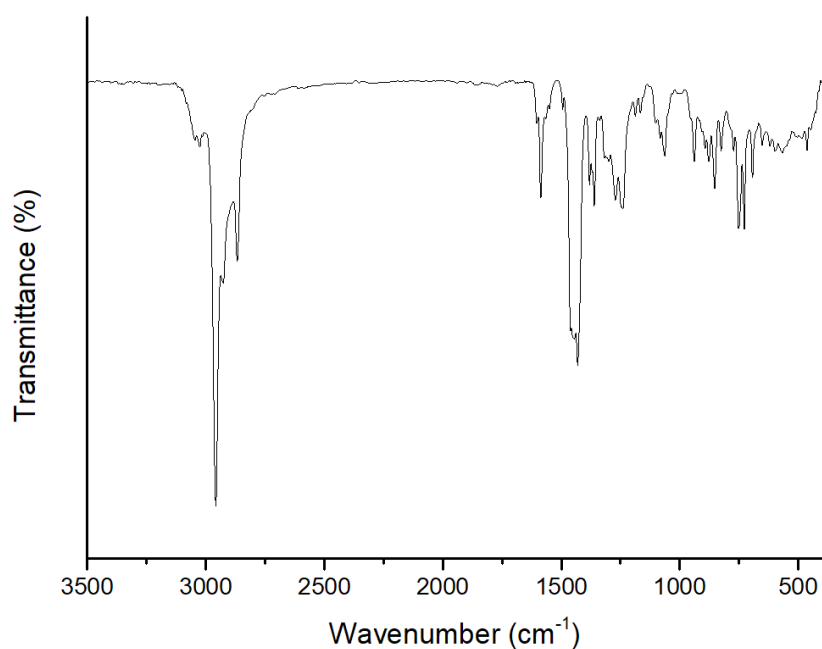

**Figure S6.** IR spectrum of **D**. IR (KBr,  $\text{cm}^{-1}$ ): 3030 (s, C–H), 2957 (s, C–H), 2863 (s, C–H), 1591 (m), 1435 (m), 1243 (m), 1071 (m), 754 (m).

## UV-Vis spectra of metal complexes

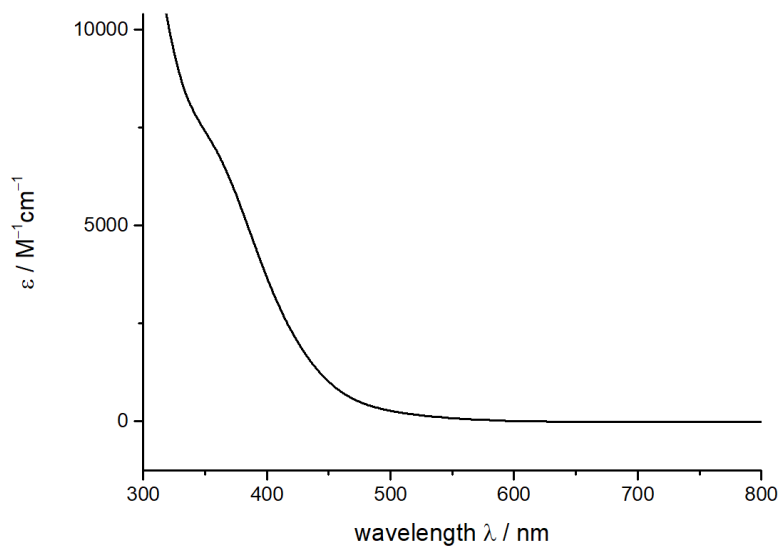

**Figure S7.** Electronic adsorption spectrum of **A**, recorded in benzene. UV/Vis (Benzene, 0.1 mM, 25 °C, nm ( $\epsilon = M^{-1}cm^{-1}$ )):  $\lambda (\epsilon) = ca. 361$  (ca. 6769, shoulder).

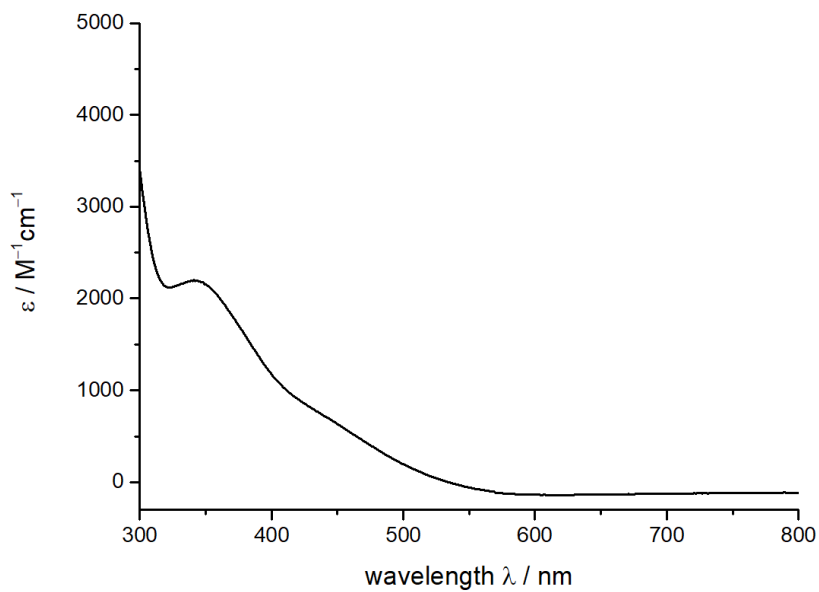

**Figure S8.** Electronic adsorption spectrum of **B**, recorded in benzene. UV/Vis (Benzene, 0.1 mM, 25 °C, nm ( $\epsilon = M^{-1}cm^{-1}$ )):  $\lambda (\epsilon) = 342$  (2190).



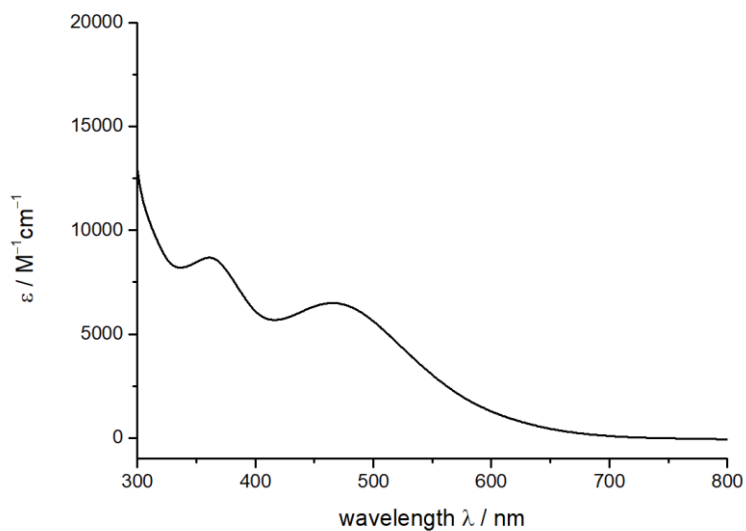

**Figure S9.** Electronic adsorption spectrum of **C**, recorded in benzene. UV/Vis (Benzene, 0.1 mM, 25 °C, nm ( $\epsilon = \text{M}^{-1}\text{cm}^{-1}$ )):  $\lambda$  ( $\epsilon$ ) = 362 (8687), 465 (6490).

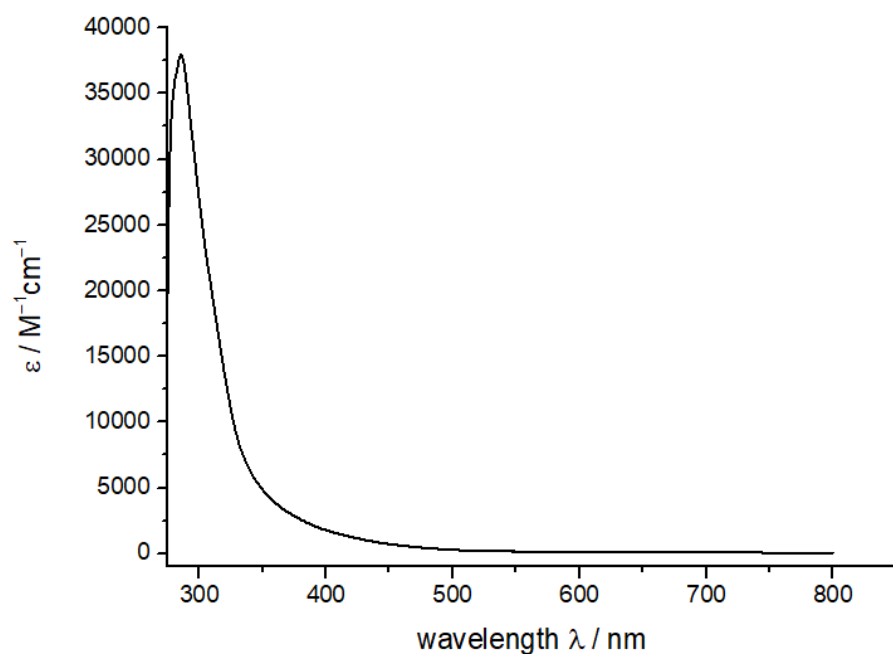

**Figure S10.** Electronic adsorption spectrum of **D**, recorded in benzene. UV/Vis (Benzene, 0.1 mM, 25 °C, nm ( $\epsilon = \text{M}^{-1}\text{cm}^{-1}$ )):  $\lambda$  ( $\epsilon$ ) = 285 (37892), ca. 639 (ca. 112, shoulder).

## DFT

Density functional theory (DFT) calculations were performed using Gaussian09<sup>8</sup> at the clusters at Pohang University of Science and Technology (POSTECH). Geometry optimizations were carried out using the atomic coordinates from crystal structures (for **A**, **B**, and **C**). The nature of all stationary points calculated from full optimizations was confirmed via frequency analysis, which revealed zero imaginary frequency for the ground state. All geometries were optimized using the B3PW91<sup>9,10</sup> under standard convergence criteria with the following basis sets, which include SDD quasirelativistic pseudopotentials on Mo (28) with associated basis set (8s7p6d1f)/[6s5p3d1f]<sup>11</sup> augmented by polarization functions (Mo: f, 1.043),<sup>12</sup> and 6-31G(d,p)<sup>13</sup> on H, C, N and O.

### Intramolecular Proton Transfer from **A** Generating Molybdenum Nitride **A'**

**Figure S11** illustrates a thermodynamically demanding energy in the activation of molybdenum nitride complex (**A**) by the deprotonation from the dative amide ligand. Computational result insists that this process is endergonic with requiring  $\sim 7$  kcal/mol. The reason for this unfavorable transformation is coming from the geometric change from square pyramidal to trigonal bipyramidal structure. The resulting shift in relative position of nitride and axial amine ligand caused by the deprotonation makes both ligands to be located in the axial position of trigonal bipyramidal symmetry. In that case (**A'**), the strong trans-influence from the nitride ligand weakens orbital interaction between the metal center and the axial amine ligand, originating the destabilization of the whole structure.

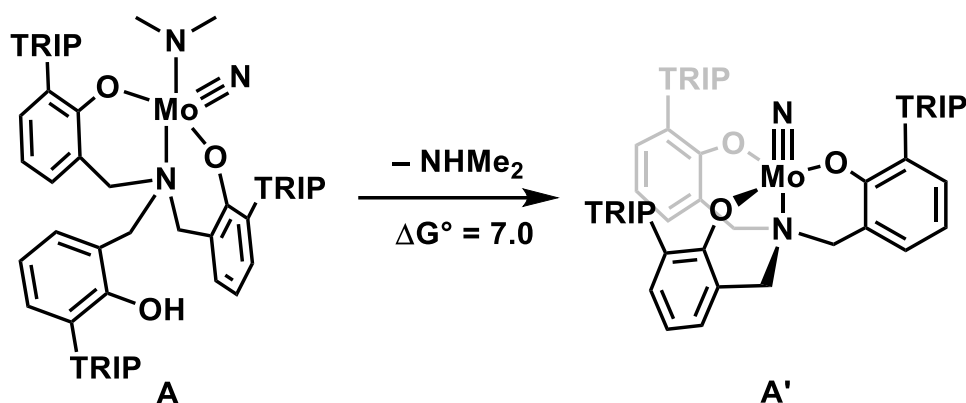

**Figure S11.** Transformation of **A** to **A'** with the liberation of  $\text{NHMe}_2$ . The energy represents the Gibbs free energy change in kcal/mol.

(a)

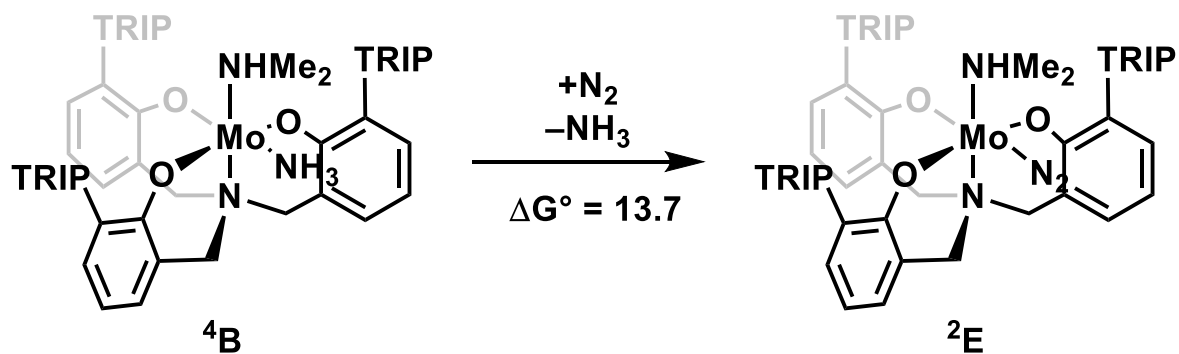

(b)

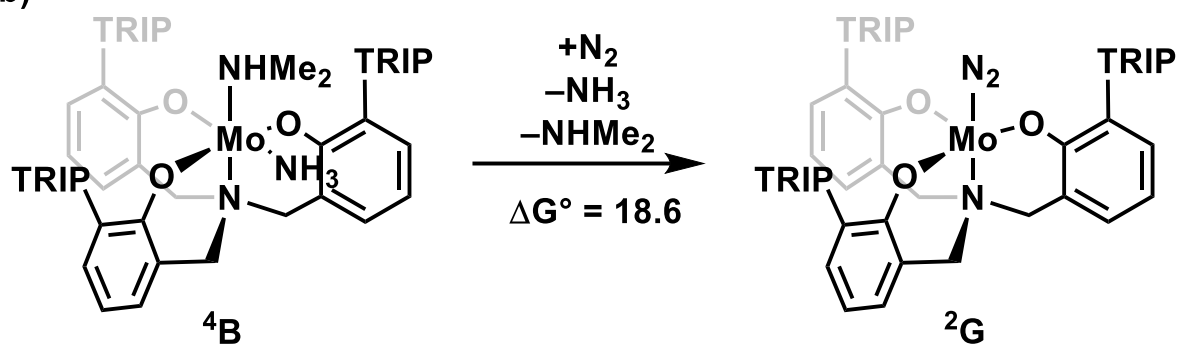

(c)

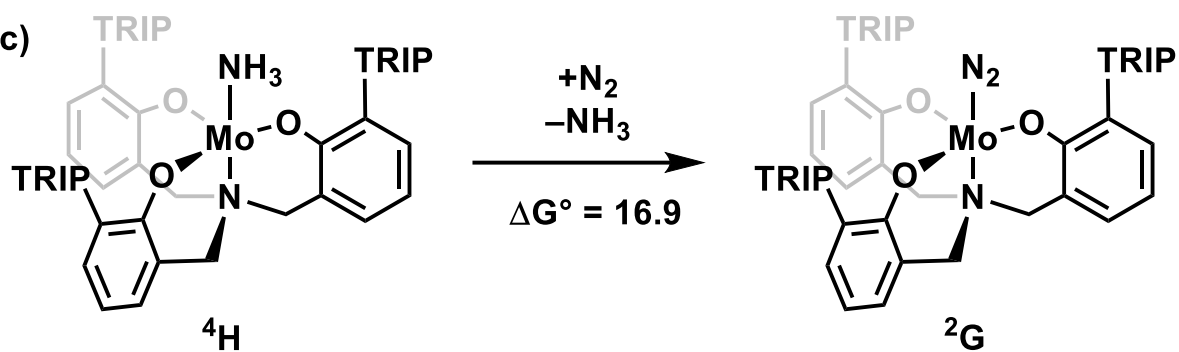

**Figure S12.** The reaction energy for the  $\text{NH}_3/\text{N}_2$  exchange. Superscripts indicate spin multiplicities. The energy represents the Gibbs free energy change in kcal/mol.

## Coordinates of optimized structures

**A**

$E^\circ = -3103.446782$ ;  $G^\circ = -3102.12802$

Charge = 0; Multiplicity = 1;

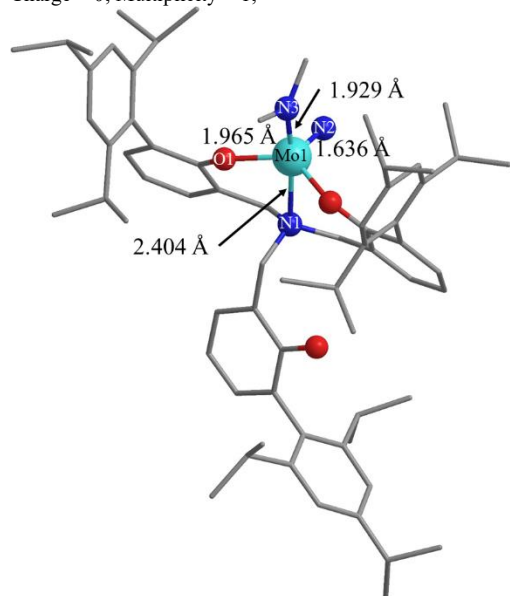

Mo 19.9891473548 3.7284770758 25.0148521345  
 O 21.6680205359 4.5225225413 25.6576239988  
 O 19.1988825821 3.7695711589 23.2290862977  
 O 21.9633666847 2.637657887 20.0764682389  
 N 21.6190070455 2.5083239222 23.7374592486  
 N 18.7909785922 4.9679167336 25.8804984897  
 C 23.3612158697 2.8274240874 25.5864340783  
 N 19.6161743703 2.345255317 25.804508363  
 C 23.9930704503 1.6757522021 18.3438819512  
 C 23.4971159648 1.0370444215 15.6345071818  
 C 24.6256958465 2.4056819091 26.0103948636  
 C 22.5625475113 1.8939112815 24.7075330122  
 C 22.8611538313 4.0570524852 26.0552932839  
 C 23.6392918485 4.8574633976 26.9237949045  
 C 24.0081221554 2.6923339866 17.3611824438  
 C 23.4247622606 2.8589616826 21.9272309773  
 C 19.7621911571 1.7024028692 22.1516950913  
 C 24.7297378043 2.7716553945 22.4261305107  
 C 23.297877549 7.3435378532 26.6720636954  
 C 18.9397470751 2.8322740342 22.2984793447  
 C 23.2135164016 2.4930708779 20.585886428  
 C 23.7276096522 0.3378763489 17.9657248761  
 C 23.1233988875 6.1667742835 27.43222284  
 C 25.3957906798 3.1759380588 26.873836557  
 C 22.4973341049 6.2346186782 28.6935511292  
 C 16.9633351997 4.2383465578 21.5684344669  
 C 24.8978257329 4.3982036935 27.3186870648  
 C 22.8467284926 8.5595433377 27.1886283742  
 C 24.2650057613 2.0200540304 19.7763099132  
 C 23.4920988828 0.0482557317 16.6204833098  
 C 22.2238210476 8.651728505 28.4350331234  
 C 17.8427223973 3.0357158017 21.4303252355  
 C 14.9031272416 5.2622748526 22.3230461287  
 C 22.3003481357 3.4284240997 22.769784  
 C 17.5787725981 2.0839942168 20.4430200685  
 C 23.7541451829 2.3483416796 16.029975134  
 C 19.4569010797 0.7725399676 21.1544703571  
 C 15.7262740525 4.1364467063 22.2429915033

C 20.9261104178 1.3821419223 23.061818264  
 C 17.3446731295 5.4651738441 20.9885533273  
 C 23.2368902512 0.7022724789 14.1763543146  
 C 24.3024349968 4.1457829919 17.7070563871  
 C 15.2613102404 6.4875722934 21.75814466  
 C 24.002748992 7.3273584669 25.322586746  
 C 22.0611622182 7.4767642878 29.1660356042  
 C 25.7814206084 2.2957726104 21.6487272848  
 C 25.5428362471 1.918953819 20.3299953487  
 C 18.6463991907 5.6188556542 20.2144933886  
 C 22.2971922665 5.0017625493 29.5645897143  
 C 18.3721434765 0.9477652646 20.3046620328  
 C 21.7495706063 9.9840310386 28.9888206171  
 C 23.0921001763 5.0498420037 17.4347799427  
 C 16.4855854275 6.5626724021 21.0962048541  
 C 18.3761734012 5.8579927457 18.7219274537  
 C 21.8434963373 0.0938076732 13.9694127037  
 C 24.3296540025 -0.2096909623 13.6022199082  
 C 23.7114577231 -0.7944128755 18.9832336195  
 C 23.1512148693 7.9500440879 24.2094281399  
 C 22.918052269 10.9523214977 29.2186689134  
 C 23.1418194176 5.0780575291 30.8442543486  
 C 20.6715084848 10.6230050043 28.1035098496  
 C 15.2538820596 2.8305728959 22.8690315827  
 C 25.5521019999 4.6565904682 16.9767664074  
 C 25.3766537192 8.0069968342 25.4105648188  
 C 24.9090372089 -1.7346620415 18.7858032089  
 C 14.3499490769 7.6993529805 21.8476703668  
 C 20.8187096966 4.7621893723 29.8952281173  
 C 19.5388900995 6.7220185475 20.7964233744  
 C 22.3906715095 -1.5748396211 18.9611680316  
 C 13.0141239168 7.4614901167 21.1304885479  
 C 14.1239246841 8.1392589777 23.300122332  
 C 18.82317522 6.3548453 25.4456758487  
 C 14.9707379484 2.9743094636 24.369556665  
 C 17.8272792971 4.7354144213 26.9367837326  
 C 14.0298802877 2.2693883732 22.1313430562  
 H 21.9717114933 2.3206638471 19.1605687596  
 H 25.0084215107 1.4536791508 25.6476002943  
 H 23.2652446378 1.2486658445 24.1606165645  
 H 21.9541940533 1.2419904241 25.3433951655  
 H 24.9199324795 3.0941136492 23.4458202082  
 H 26.3753348179 2.8316808998 27.1912967006  
 H 25.4888314179 5.017915403 27.9878524276  
 H 22.99365735 9.4637063372 26.6016479724  
 H 23.2982134805 -0.9827310181 16.33402527  
 H 13.9498497027 5.1760966946 22.8406887903  
 H 22.6870287766 4.2578096248 23.3678173023  
 H 21.5163850699 3.8219249888 22.1207505818  
 H 16.7332789396 2.2462930461 19.7798550008  
 H 23.7635017128 3.129750197 15.2726308202  
 H 20.0894967766 -0.1060376316 21.0481231357  
 H 20.5689997296 0.7286460447 23.8651387189  
 H 21.6680079168 0.8106632126 22.4850757087  
 H 23.270245786 1.6486698599 13.62019901  
 H 24.5131422665 4.1948975707 18.7800549321  
 H 24.1756901629 6.2802127396 25.0531632257  
 H 21.5823234853 7.5320350858 30.1421510633  
 H 26.782911326 2.235337497 22.0635350674  
 H 26.3554258812 1.5601744007 19.7039729985  
 H 19.1968158963 4.6764603818 20.2980437304  
 H 22.6447991722 4.1336403401 28.9956817401  
 H 18.1511133751 0.2123497638 19.5368051703  
 H 21.2938014206 9.7795622517 29.967215662  
 H 22.8219011752 5.0529027403 16.3730488964

H 23.3130995773 6.0828251849 17.72421148  
H 22.2184674726 4.7208173651 18.0053864077  
H 16.7756661407 7.5082633427 20.6413439402  
H 17.7830455591 5.0445561114 18.2925300431  
H 19.3165500406 5.9245893937 18.1632563928  
H 17.8258178356 6.7916790505 18.5606146581  
H 21.7491952163 -0.8688693444 14.4836805621  
H 21.6522364054 -0.0801164475 12.9050729391  
H 21.0601804891 0.75474856 14.3527595379  
H 25.321791025 0.2361250271 13.7214333189  
H 24.1619970838 -0.3897275662 12.5348479796  
H 24.3388028099 -1.1829036497 14.1052367549  
H 23.8110103576 -0.3450358932 19.9767566105  
H 22.1784121258 7.4552428671 24.1369678014  
H 23.6566205648 7.8548476145 23.2419274952  
H 22.972536018 9.0172785617 24.3806882955  
H 23.6735411127 10.5120210814 29.8765236728  
H 22.5669314799 11.8838644559 29.6763660879  
H 23.4095434362 11.2113555682 28.2744064577  
H 24.2048879977 5.1968701224 30.6127038004  
H 23.0238927136 4.165307822 31.4386777007  
H 22.842360275 5.9252608664 31.4714335914  
H 21.0650278751 10.8643530872 27.1100206261  
H 20.3035080451 11.5538425716 28.5491223373  
H 19.8192419399 9.9496120561 27.9693032573  
H 16.0621868769 2.1005726919 22.7621609164  
H 26.4225624562 4.0303128128 17.1949223223  
H 25.7838156573 5.6807496556 17.2881584123  
H 25.4111012236 4.6651054585 15.8904730326  
H 25.2789223896 9.0648500758 25.6790932566  
H 25.8998417904 7.9523773001 24.4492234907  
H 26.0061474199 7.5289215409 26.1674301299  
H 24.8764230431 -2.2187222923 17.8034606349  
H 24.9107762628 -2.5223953389 19.5470297761  
H 25.856481346 -1.1919491236 18.8576149152  
H 14.8601592806 8.5228509054 21.3296318566  
H 20.395687787 5.5835212884 30.4844793794  
H 20.7021063633 3.8427649888 30.479610738  
H 20.2267949164 4.6597582357 28.9816722947  
H 19.0668816355 7.7080926931 20.7242996275  
H 20.4901259974 6.7719630351 20.2549361763  
H 19.7560446717 6.5292532842 21.8507656417  
H 21.5336803324 -0.9096535135 19.1047538297  
H 22.3776702282 -2.3250273547 19.7592439868  
H 22.2453208731 -2.1041906635 18.0133610935  
H 13.1711211303 7.1788799835 20.0850408631  
H 12.3946138241 8.3650010137 21.1510138028  
H 12.4446323821 6.6578782186 21.6101807036  
H 13.6075385115 7.361906391 23.8738111639  
H 13.509887331 9.0457944034 23.3420713096  
H 15.0736132606 8.3481682597 23.8024490101  
H 19.5576012975 6.5005459874 24.6477028031  
H 19.0991665877 7.0166608386 26.2780587954  
H 17.8423244732 6.6624531445 25.0579207193  
H 15.8547687605 3.3363128372 24.9013040464  
H 14.6903391813 2.0063389806 24.7994424296  
H 14.1481765056 3.6715714102 24.5643898201  
H 17.8447315513 3.6846470893 27.2282088299  
H 16.8136829301 4.9992519644 26.6014962074  
H 18.0571190936 5.3560966312 27.8151102948  
H 13.1732073171 2.9488290325 22.2050706455  
H 13.7291921208 1.3061922758 22.5585102429  
H 14.2411962864 2.1172946197 21.0683180026

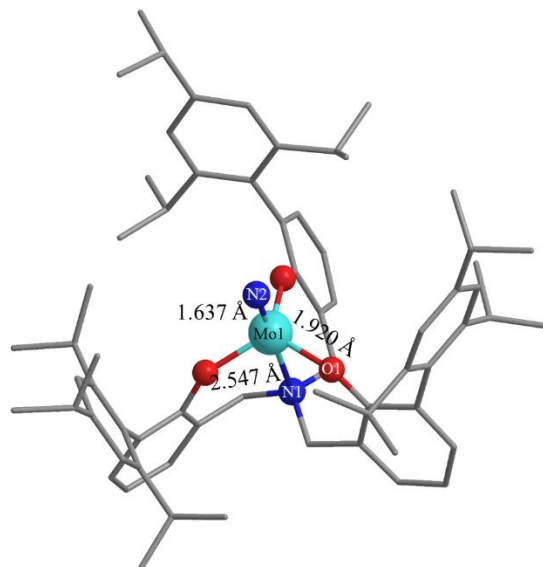

Mo 5.2010453883 8.1412367242 16.5914961778  
O 5.5711716924 6.3112869848 16.1437600751  
O 5.5358577903 8.6895576474 18.4009328452  
O 5.4587967907 9.4426394735 15.2030215959  
N 7.745785086 8.2291237196 16.5465405212  
N 3.5651948622 8.0921858293 16.6185262243  
C 6.2224326429 9.7757963583 20.376549616  
C 6.603214579 5.4655793477 15.9324629894  
C 6.5467997356 8.9966457864 19.2427606879  
C 7.8912907862 5.9194361425 15.5835792026  
C 6.0763073173 10.643576359 13.2698292902  
C 4.7289399638 10.4214767724 12.6577011365  
C 4.5914961546 9.4858368439 11.6100394936  
C 6.33570447 4.0833536935 16.0580848653  
C 6.4304238097 10.084462385 14.5190435023  
C 4.8549153335 10.3480425861 20.5812953271  
C 3.6107366663 11.1717930806 13.0805199015  
C 2.2228140922 10.0577141686 11.4043539683  
C 7.741108733 10.2167552157 15.0197219446  
C 8.2503839795 7.7210122647 17.8352367602  
C 0.8799821425 9.8576581868 10.724404018  
C 7.3617307316 3.1798181347 15.766938022  
C 4.8807371088 3.1101542381 17.8585326351  
C 8.6728919341 10.9529207634 14.2836696082  
C 5.0103053758 3.5737132197 16.529685197  
C 2.5574200431 2.4910761857 17.4205628932  
C 2.3852589039 10.977060735 12.442052613  
C 2.7101931925 2.9596470723 16.1174784895  
C 2.3245689731 11.4976292561 21.0897735162  
C 3.7085718166 12.2141791068 14.1843606323  
C 8.3270695585 11.5529511092 13.0790064615  
C 8.1530184972 9.6320788696 16.3438886121  
C 3.3393499312 9.325437154 11.008589165  
C 7.0383905212 11.3865059979 12.5794620618  
C 4.6307946217 11.7171444121 20.3115334385  
C 3.9970261512 8.0800037924 21.4186353879  
C 7.8683816973 8.5559888925 19.0279370822  
C 7.2299331214 10.0440500973 21.3076322265  
C 3.9102717624 3.5032934275 15.6517690071  
C 8.6300010828 3.6140254795 15.3919698025  
C 3.8095183603 9.5537914583 21.0931745409  
C 8.8445843124 8.8652137658 19.9785448965  
C 3.6578445783 2.5788672147 18.2739293539  
C 3.3710569059 12.2608453676 20.5708871085  
C 5.7554689101 8.6414937617 11.1057342205  
C 6.0287710707 3.1702888396 18.8594303111  
C -0.1876409736 9.3569851439 11.7062313543  
C 8.5325566506 9.5897549598 21.1225291703  
C 1.2346018501 1.9081293765 17.8851578927

A'

$E^\circ = -2968.295705$ ;  $G^\circ = -2967.06015$

Charge = 0; Multiplicity = 1;

C 2.5697883126 10.1493145004 21.3407987974  
 C 5.7145852657 12.624887771 19.742699746  
 C 0.9604913554 12.1041391704 21.3675858091  
 C 8.2096534063 7.3824357695 15.4317952547  
 C 8.888847137 4.977358659 15.3194893825  
 C 2.686573757 11.9698516596 15.3016630859  
 C 5.4820926289 7.1390618347 11.2572116845  
 C 6.1156137381 8.9879914048 9.654252465  
 C 1.3700729429 0.4343356683 18.2902064168  
 C 0.4133750419 11.1281383662 10.0010484733  
 C 1.0351934763 13.2344635292 22.402542013  
 C 3.9968619127 3.9647965698 14.205073069  
 C 2.9579554445 7.1992627362 20.7131201408  
 C 0.2781428514 12.5797995123 20.0779029553  
 C 5.3003089544 13.2378698252 18.398246252  
 C 5.6684315193 4.0030506341 20.0970341736  
 C 0.6120586494 2.737312366 19.0163514073  
 C 3.5794025382 13.6339688685 13.6133765944  
 C 6.4996951495 1.7664095382 19.2639989001  
 C 6.1185795197 13.7186851805 20.7411833333  
 C 2.9119909466 4.9940275312 13.8628628708  
 C 3.9873315174 7.8438039972 22.936123934  
 C 3.9506163486 2.7691102971 13.2422354893  
 H 9.3505447395 7.640623963 17.801020401  
 H 7.8702443859 6.6986658877 17.9515326635  
 H 1.0203018664 9.0781400019 9.9630650124  
 H 7.1501830065 2.1173784055 15.8477807375  
 H 9.6835092377 11.0563520484 14.6719996047  
 H 1.5302368329 11.5644011322 12.7682317163  
 H 1.8620852167 2.8970105428 15.4389174441  
 H 4.7050795656 12.1346161461 14.6307964833  
 H 9.059406709 12.1328151659 12.525540404  
 H 9.248580678 9.7221360306 16.4410994595  
 H 7.7214594692 10.2155754089 17.1666686257  
 H 3.2299427507 8.6037321376 10.2013210284  
 H 6.7608976676 11.8300585316 11.6274243534  
 H 4.9837538932 7.7803413474 21.0507226228  
 H 6.9754804333 10.6292549355 22.1868172519  
 H 9.4132721957 2.8951066228 15.1716427452  
 H 9.8636709209 8.5234900482 19.812843476  
 H 3.5643492314 2.2239431193 19.2979859551  
 H 3.2044305562 13.3147664562 20.3595482464  
 H 6.6304907712 8.8742606723 11.7209352245  
 H 6.8731804371 3.6672485877 18.3711947033  
 H 0.1318003261 8.4359142081 12.2027386882  
 H -1.1303507632 9.1570107067 11.1849322726  
 H -0.3903913696 10.1002287964 12.4847713959  
 H 9.300526452 9.8112266295 21.857427801  
 H 0.5485569729 1.9528286924 17.0284990983  
 H 1.7639720034 9.5397447975 21.7442521794  
 H 6.6027412142 12.0120256397 19.5580815245  
 H 0.3376331641 11.3065724574 21.7946377045  
 H 7.7505005611 7.7744381552 14.5160485795  
 H 9.3002155648 7.4932053329 15.304725737  
 H 9.8817120868 5.3281969073 15.0476037161  
 H 1.6584812275 12.0936368683 14.9440369222  
 H 2.8351793315 12.6859883507 16.1167856941  
 H 2.7812550508 10.9597765404 15.7095681474  
 H 5.242892557 6.8831475653 12.293432488  
 H 6.3591970516 6.5566892199 10.9531837949  
 H 4.6412708485 6.8167694747 10.6335987165  
 H 5.2845584708 8.7697628316 8.9746017412  
 H 6.9809115828 8.4046924469 9.3200240069  
 H 6.3598482938 10.0493506227 9.5463103721  
 H 1.785812461 -0.1650335182 17.4743831079  
 H 0.39436998 0.0147990863 18.5592170559  
 H 2.0295093233 0.3196254281 19.1575641006  
 H 0.2398558979 11.9462713568 10.7086095058  
 H -0.5260572928 10.9474222695 9.4670218832  
 H 1.1586344396 11.4682789599 9.2753774171  
 H 1.4950835275 12.8904642665 23.3341024572  
 H 0.0339436808 13.6132642696 22.6356425904

H 1.6281875961 14.0767380584 22.0293093796  
 H 4.9667706186 4.4541972852 14.068408452  
 H 1.944149205 7.4000637772 21.0766092993  
 H 3.1662067954 6.1402631064 20.8986123183  
 H 2.96654597 7.3669635602 19.6326385924  
 H 0.8446373131 13.3899350063 19.6055847292  
 H -0.7287156491 12.9574342738 20.2881438334  
 H 0.1942882693 11.765722097 19.3518302276  
 H 5.0358138447 12.461586733 17.6743323738  
 H 6.1190515639 13.8336858071 17.979147405  
 H 4.4339682335 13.8993685509 18.5064827619  
 H 5.3485328353 5.0107917114 19.8165634897  
 H 6.532751049 4.0904041694 20.7650206439  
 H 4.8558067774 3.5437315139 20.6698862625  
 H 1.240336372 2.7190606308 19.9136474381  
 H -0.3711851422 2.3402836562 19.2922555678  
 H 0.4879530935 3.7827035393 18.718398674  
 H 4.3425094901 13.8280747848 12.8528145659  
 H 3.6914564284 14.3815571403 14.4065806534  
 H 2.5993557991 13.7857218206 13.1474207398  
 H 5.7011581656 1.2076168751 19.7642595341  
 H 7.3473062092 1.8269212009 19.9558167005  
 H 6.8139236743 1.1840369917 18.3922813562  
 H 5.2771950881 14.3828511873 20.9676138606  
 H 6.9280920765 14.334747647 20.3339381651  
 H 6.4628252093 13.2882105349 21.6866862072  
 H 1.9089664314 4.5567005713 13.9170278375  
 H 3.0494080881 5.3680402797 12.8427048019  
 H 2.9447542862 5.8454449978 14.5480800102  
 H 4.7645893113 8.4310892356 23.4354371859  
 H 4.1612713434 6.7862822263 23.1641245056  
 H 3.0237047182 8.1257829139 23.3748261925  
 H 4.7576049436 2.0591619652 13.4498156528  
 H 4.0510759667 3.1046792078 12.2040531128  
 H 3.0014006967 2.2285365983 13.3284037278

**B**  
 $E^{\circ} = -3105.271777$ ;  $G^{\circ} = -3103.911259$   
 Charge = 0; Multiplicity = 4;

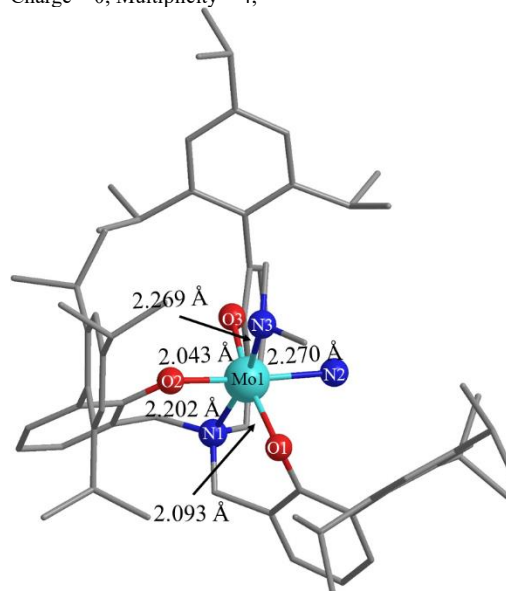

Mo 15.3720734629 8.9576728818 6.3792407658  
 O 14.5151933707 10.6563356683 7.2513706384  
 O 16.6659979746 7.4601966535 5.7651493091  
 O 13.6192637864 7.9571907148 6.0634196667  
 N 15.4949156553 7.9454824981 8.3308681764  
 C 12.9546617439 7.0447910631 6.7564937325  
 C 16.909522308 7.9014128099 8.7629919889  
 C 18.6672828785 6.2019208643 4.2288033279  
 C 17.880460856 7.1766217313 7.8470861243

C 17.7280832988 7.0353627088 6.4348605118  
C 13.5404470198 6.3675227042 7.8565596592  
C 15.0568484423 10.1406851042 9.5184508172  
C 15.1609338466 13.4904721378 7.6206166228  
C 15.2185273839 12.4418521042 8.6922736985  
C 19.0187061625 6.6520076782 8.4741692827  
C 18.7666328057 6.3725543573 5.7121571788  
C 14.9164441114 11.0684267912 8.4449988591  
C 10.9155483927 7.467844536 5.2982656328  
C 16.3498118576 14.0878824955 7.140999464  
C 11.6157146137 6.7292079929 6.3950944481  
C 15.5911421411 12.8288652931 9.9855520998  
C 13.8896573976 14.9605185457 6.1656787566  
C 17.7372903845 13.7096701974 7.649933947  
C 17.9189443131 5.1337270011 3.6875333007  
C 13.9134573611 13.9546743622 7.1318197825  
C 14.9930433703 6.5415890949 8.2043468522  
C 11.1851019562 7.179518698 3.938790889  
C 15.455011515 10.5766657897 10.7826657486  
C 12.8032144753 5.4136110891 8.5614043136  
C 15.7164206284 11.9195974183 11.0320092436  
C 20.0208721308 6.0072871003 7.7653114192  
C 12.6040519111 13.4365300609 7.7128082006  
C 14.6655785332 8.7016307677 9.3218390486  
C 19.3674074266 7.0688126573 3.3635128973  
C 19.8793990373 5.8727023274 6.3844997648  
C 15.0547725014 15.5484553967 5.6673852501  
C 10.5016897449 7.8819781223 2.9456596279  
C 11.5030858512 5.0861714029 8.1953369646  
C 17.2014796082 4.1301795892 4.5790076055  
C 10.9279020856 5.7473868465 7.112672771  
C 18.7387255173 13.4434216065 6.5152508382  
C 19.2950858307 6.8566383561 1.9828090741  
C 20.2392328326 8.2015604051 3.8910904125  
C 9.2868261988 9.1156507201 4.588718  
C 9.9456168628 8.4385602485 5.6224235168  
C 16.2679700632 15.1003136725 6.1761486404  
C 17.8746528614 4.9654266261 2.3022084266  
C 18.5542448092 5.815402675 1.427453861  
C 11.4148271647 13.5414222294 6.7541595526  
C 15.0045535987 16.6495809918 4.6230058117  
C 9.5502831098 8.8612315785 3.2468237436  
C 14.2969559036 17.9041163118 5.1531714124  
C 12.1457517457 6.060875885 3.5592079843  
C 19.9322650059 9.5518883998 3.2316021225  
C 18.3044341746 14.7881460488 8.5864404889  
C 21.7306093445 7.8647204012 3.7444132839  
C 9.5814656071 8.777416376 7.0617367534  
C 12.2779530274 14.1663376815 9.0266562757  
C 15.7017170723 4.0476530905 4.2750887072  
C 14.3641692648 16.168497995 3.3142659351  
C 18.5147370975 5.6049419464 -0.0761773108  
C 9.7801203358 10.4471266647 1.2906039125  
C 12.8664760411 6.2838677274 2.2263223015  
C 8.8182804998 9.6169022764 2.1511614369  
C 17.8607484514 2.7461706581 4.4927361824  
C 9.8723312649 10.2452756307 7.392538467  
C 8.1207056087 8.4220849198 7.3712322293  
C 11.4143673631 4.7089289303 3.5413231257  
C 7.9704602377 8.6803224669 1.2798929959  
C 17.0898140701 5.7069457662 -0.635585767  
C 19.1703102562 4.2765397257 -0.4779522687  
H 16.9533131045 7.4247742389 9.7556272963  
H 17.2128185504 8.9438166444 8.9227807826  
H 19.1081301282 6.753058952 9.5548131409  
H 15.7834889916 13.8830674705 10.167564451  
H 12.9295367971 15.3075424696 5.7961636754  
H 17.6389105877 12.792944151 8.2439500311  
H 15.1937489384 6.030181237 9.1574960941  
H 15.6179367204 6.0698910425 7.4408303775  
H 15.5393698892 9.8484210482 11.587308857  
H 13.2719509568 4.905595193 9.4024350168

H 16.0081363122 12.2542635737 12.0225665356  
H 20.8894417178 5.6044202563 8.2767128611  
H 12.7461744041 12.375014058 7.940142255  
H 14.712693165 8.1728443718 10.285227909  
H 13.6351913647 8.6330273641 8.9584357287  
H 20.6443666704 5.3593423861 5.8073705108  
H 10.708792716 7.6544064124 1.9034805063  
H 10.9453102442 4.3343971664 8.7449751361  
H 17.3058066521 4.4746346848 5.6126244742  
H 9.907038337 5.5162084332 6.8176484313  
H 18.336527652 12.7589435065 5.7618498896  
H 19.6648342697 13.013688143 6.9127651751  
H 19.0114730862 14.3661602268 5.9930206353  
H 19.8435691131 7.5182595001 1.3147583886  
H 20.0326378598 8.3007207994 4.9625324392  
H 8.5416988431 9.8682861465 4.8413397939  
H 17.1847433607 15.5607972586 5.8134128577  
H 17.3013300826 4.1350285301 1.8950951861  
H 11.1272475626 14.5821917202 6.5664460717  
H 10.5435541214 13.0459994835 7.1906839512  
H 11.6230659401 13.066453459 5.7902583309  
H 16.043915979 16.9269433591 4.3996406892  
H 13.2460229194 17.6986195405 5.3839295005  
H 14.3224790571 18.708143675 4.4094054422  
H 14.772535583 18.2698213216 6.0682864527  
H 12.9112674367 6.0127922039 4.3408902946  
H 20.1802236114 9.5530263566 2.1649241722  
H 20.5184810085 10.350393942 3.7005144368  
H 18.8713472096 9.8073240637 3.3190557014  
H 18.4104214185 15.7420254716 8.0582857185  
H 19.2928117643 14.4982933062 8.9606105787  
H 17.6533595992 14.9568638442 9.4476720107  
H 21.9802424423 6.9362776334 4.265691095  
H 22.354971579 8.6646684661 4.1585481884  
H 22.0023533133 7.7374253702 2.6906079159  
H 10.2112361393 8.1687943892 7.7164114819  
H 13.077161495 14.0474473866 9.7626997668  
H 11.3538884383 13.7734587103 9.4652384245  
H 12.1376469836 15.2384513111 8.8466886053  
H 15.2326949589 5.0302270726 4.3715421863  
H 15.205962447 3.3636399693 4.972637634  
H 15.5134006461 3.6749011033 3.2618015961  
H 14.8927300156 15.2995433616 2.9098296507  
H 14.3832876934 16.9608682451 2.5579563821  
H 13.3183373244 15.8810698209 3.4671884756  
H 19.105095271 6.4137379429 -0.5283717542  
H 10.3592469001 11.1435279296 1.9052855211  
H 9.2313610559 11.0290181376 0.5415842341  
H 10.4882754984 9.8035820706 0.7569662028  
H 12.1891123094 6.1862178631 1.3703851439  
H 13.655378041 5.5364306292 2.0973612044  
H 13.3298332052 7.2740366773 2.1739216901  
H 8.1326708211 10.3164168642 2.6483276777  
H 17.7909032504 2.3335939376 3.4798829149  
H 17.3701626574 2.0418150211 5.1737940975  
H 18.9210270361 2.7941587714 4.7599446281  
H 10.9236780673 10.4851438094 7.2103245336  
H 9.6518032617 10.4525147148 8.4459964079  
H 9.2610459041 10.9233965199 6.7867332455  
H 7.42617823 9.008093491 6.7588071343  
H 7.8888656822 8.625577903 8.4227217636  
H 7.918947944 7.3636783783 7.1787408061  
H 10.9632302874 4.4883362443 4.5123826944  
H 12.1082883152 3.8962703015 3.2984014805  
H 10.6175363445 4.711295352 2.7887345424  
H 8.5994875406 7.9612940038 0.7437040472  
H 7.4045064614 9.2480889328 0.5328877651  
H 7.2595732211 8.1114485871 1.8868574795  
H 16.4474236506 4.9161886253 -0.2333354084  
H 17.0927339466 5.6079491384 -1.7267074559  
H 16.6321812923 6.6680059893 -0.3814808131  
H 20.1991575582 4.2158744166 -0.1101339443

H 19.1895196961 4.1651493562 -1.5677828274  
 H 18.6196635384 3.4236506756 -0.0663233767  
 N 17.2974771367 10.1508803068 6.528469628  
 H 17.5499412405 10.5657790931 5.6354590247  
 H 18.0820201612 9.5603220082 6.804660613  
 H 17.2158319131 10.915250826 7.1973083845  
 N 14.8230114529 9.7158592298 4.3125282807  
 C 15.6061894904 9.154780214 3.1988515257  
 C 14.6101364156 11.1659049487 4.1640816534  
 H 13.9063689977 9.2587134871 4.3150285374  
 H 16.5921778285 9.625190761 3.1803326344  
 H 15.1189342826 9.3397526152 2.2327391448  
 H 15.7482889944 8.0841001056 3.3483408875  
 H 14.0336427683 11.5353911892 5.0118062393  
 H 14.0986073686 11.3997362898 3.2215852673  
 H 15.5772451942 11.676892522 4.1664278205

C

E° = -3160.997832; G° = -3159.648628

Charge = 0; Multiplicity = 3;

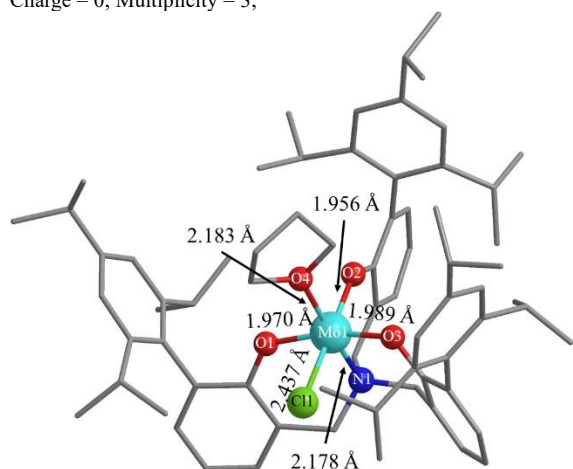

Mo -0.6374405287 -0.950882246 -0.8593498981  
 O 1.027877744 -0.7997479404 -1.9360326695  
 O -0.9841952129 0.9732145406 -0.8047904474  
 O 0.5576695761 -0.6601067716 0.9436963332  
 Cl -0.1012550919 -3.3282498727 -0.85838243  
 O -2.2383671643 -1.5574550769 0.1153400149  
 C 1.7641950158 0.1582623385 0.9260032454  
 C 2.2577252706 0.1171381882 2.3615068188  
 C 1.8586554753 -1.2930983666 2.8076303416  
 C 0.5058720379 -1.4926624931 2.137360548  
 N -1.9178042963 -1.05059323 -2.6182216601  
 C -1.1040995182 -0.702721608 -3.8248108705  
 C 0.1752939483 -1.4653517704 -4.0539032198  
 C 1.2467759214 -1.3735686205 -3.1270617393  
 C 0.3686659757 -2.0967168914 -5.2818975389  
 C 1.6147959286 -2.6063005979 -5.6308123936  
 C 2.6783240994 -2.4480077024 -4.7485848138  
 C 2.535995361 -1.8391539022 -3.495680238  
 C -2.4853447217 -2.4250462921 -2.7385298458  
 C -3.375587787 -2.8450174752 -1.5877644559  
 C -3.2023358235 -2.4190752132 -0.2461308776  
 C -4.1036057043 -2.8747986837 0.7518018948  
 C -5.1334356295 -3.745512977 0.3949300543  
 C -5.2887503263 -4.1898819562 -0.9156498298  
 C -4.4167451566 -3.727019314 -1.8921050645  
 C -3.0740888982 -0.1046950915 -2.5168788747  
 C -2.7792633252 1.3584018293 -2.3414265954  
 C -1.778086295 1.8260283662 -1.465643497  
 C -1.6074157723 3.2207605059 -1.2703260632  
 C -2.5227122239 4.0950353313 -1.8580387404  
 C -3.5346538842 3.6375117677 -2.6998021019  
 C -3.6335318745 2.2765888069 -2.959819216  
 C 3.7778237778 -1.6326170003 -2.6680438307

C -0.4516604683 3.7637000444 -0.4913009378  
 C -4.0142535753 -2.3688343458 2.1579490722  
 C 4.3183359009 -2.6352891025 -1.8247279536  
 C 5.5068008502 -2.3600035052 -1.126778965  
 C 6.1888237973 -1.1569776224 -1.2123547511  
 C 5.6674916106 -0.2046828552 -2.0856049442  
 C 4.5080257014 -0.4191140085 -2.8347795599  
 C -0.4868913435 3.7593268273 0.9203693907  
 C 0.5980023762 4.2706582334 1.6372785205  
 C 1.7260018969 4.7881812293 1.0050676994  
 C 1.7314534938 4.7985632627 -0.3887997231  
 C 0.6677601297 4.3145059645 -1.160503014  
 C -3.390324257 -3.106640747 3.1911383995  
 C -3.3381307128 -2.5433921695 4.4721567692  
 C -3.9008686986 -1.3058729776 4.7830201519  
 C -4.5527112006 -0.6241337009 3.7590629789  
 C -4.6239119347 -1.1294604953 2.4580781558  
 C 7.4614304745 -0.9140315135 -0.421838785  
 C 8.6731403548 -0.7018037971 -1.3392756489  
 C 7.3059571642 0.2524692603 0.5626969903  
 C 3.8076479161 -4.0573217073 -1.5406767626  
 C 3.2467567837 -4.142416169 -0.1104707918  
 C 2.8641008152 -4.7388704669 -2.5313241731  
 C 4.2379774376 0.6742253564 -3.8752371152  
 C 2.8188965116 1.2295104948 -3.992382474  
 C 4.7860940056 0.2780534658 -5.2561209539  
 C 2.8914109178 5.3374301085 1.8091984175  
 C 4.1905268692 4.5677073845 1.5375799856  
 C 3.0842083194 6.8416487682 1.5735385231  
 C 0.8334591742 4.519163433 -2.6713574387  
 C 0.4084124746 5.9430232628 -3.0711964896  
 C 0.2196550352 3.4943482044 -3.6310735959  
 C -1.7089063254 3.279135636 1.6876997259  
 C -1.3699574241 2.2093320091 2.7309929488  
 C -2.4453182502 4.4633143928 2.3316181502  
 C -2.8383331194 -4.5307027019 3.0871477792  
 C -3.943708151 -5.5567757267 3.3932842972  
 C -2.082164246 -4.9224446001 1.8162792271  
 C -3.83314146 -0.7312585979 6.1871216255  
 C -2.3868194547 -0.489473141 6.6384201495  
 C -4.5859043215 -1.6080113776 7.1972115335  
 C -5.4285412874 -0.3547608061 1.4218056601  
 C -6.9275957898 -0.400815616 1.753182528  
 C -4.9456729529 1.0891667727 1.2544055265  
 H 1.4717893854 1.1492028502 0.5746742535  
 H 2.4667202262 -0.2932155465 0.2198876435  
 H 3.3341463027 0.2957963821 2.4256407518  
 H 1.7463900348 0.8746154188 2.9644704921  
 H 1.7930945938 -1.3981926831 3.8938076838  
 H 2.579495564 -2.0277181443 2.4350735212  
 H 0.3138043672 -2.5175506174 1.8174975874  
 H -0.3291739984 -1.137476166 2.7480824429  
 H -1.7506225847 -0.8103846265 -4.7072564729  
 H -0.8757877961 0.3646863999 -3.7207632028  
 H -0.4616778401 -2.1619160885 -5.9819282936  
 H 1.762623254 -3.0966285679 -6.5880230536  
 H 3.6640823255 -2.810060954 -5.0273111218  
 H -1.640583199 -3.1104004822 -2.8456823384  
 H -3.0748916883 -2.4605432474 -3.6670928105  
 H -5.8307650502 -4.0644480363 1.1641951798  
 H -6.0943366817 -4.8695300139 -1.1761371823  
 H -4.544814254 -4.0486647244 -2.923684513  
 H -3.6832971453 -0.2371220855 -3.4223976723  
 H -3.6799108779 -0.4570296955 -1.6773374305  
 H -2.4159741672 5.1586768644 -1.6654960669  
 H -4.2255471233 4.3366786325 -3.1607314525  
 H -4.4069654056 1.9073389514 -3.6300263651  
 H 5.9172241135 -3.1442192029 -0.4919027539  
 H 6.1976441294 0.7358819858 -2.2228864826  
 H 0.5592985993 4.2734485662 2.7249273816  
 H 2.5941898324 5.2086924274 -0.9112821849  
 H -2.8472355766 -3.1143326965 5.2588467519



H -5.0292295306 0.3281640412 3.9843709405  
H 7.6491130003 -1.821546148 0.1681125618  
H 9.5907247313 -0.5886474317 -0.7512967682  
H 8.8066403467 -1.5477918862 -2.0203228289  
H 8.5565291865 0.2012043408 -1.94842252  
H 8.214342222 0.3795197211 1.1619645335  
H 6.4680837844 0.0836481962 1.2463495782  
H 7.1210324428 1.19479959 0.0355357024  
H 4.7244151166 -4.6654474504 -1.5466856393  
H 2.9816707663 -5.1776182547 0.1333355904  
H 3.980704653 -3.7986415388 0.6256582237  
H 2.3422503974 -3.5382832119 -0.0169169628  
H 2.7223597478 -5.7779808406 -2.2116150568  
H 3.2792917363 -4.7591543678 -3.5422009666  
H 1.8797757596 -4.2714488191 -2.5675518387  
H 4.8536217475 1.5186638298 -3.5388667191  
H 2.8546583678 2.1976389353 -4.5037948254  
H 2.3701423425 1.3803210151 -3.0079474736  
H 2.161468676 0.5790970209 -4.5730137908  
H 4.7443165933 1.1342327701 -5.9396237798  
H 5.826932599 -0.0541171586 -5.1904504037  
H 4.1964339452 -0.529184158 -5.6993951714  
H 2.640908622 5.1993578861 2.8698766999  
H 5.0030538593 4.9414435844 2.1703425381  
H 4.0675914025 3.4988031564 1.7369489518  
H 4.5062597026 4.676617728 0.4943318518  
H 3.8861127254 7.2346926776 2.20818722  
H 2.1686522222 7.3981455179 1.7958355304  
H 3.3544459007 7.0473060306 0.5319945353  
H 1.9185566152 4.4655765903 -2.8335736818  
H 0.6584326981 6.1358965649 -4.120669539  
H 0.9081342618 6.6980703799 -2.4567147791  
H -0.6717911922 6.0779287715 -2.9572456255  
H 0.6867331518 3.6082543948 -4.6155251679  
H 0.3997466665 2.4713984625 -3.295310961  
H -0.8554205832 3.6296541197 -3.7615193082  
H -2.3946264307 2.8251992879 0.9669733447  
H -2.2835837354 1.8289557168 3.1991310602  
H -0.8555319785 1.3648874216 2.2655485466  
H -0.7325282327 2.6083753826 3.5285258686  
H -3.3495802585 4.1211916129 2.8469086716  
H -2.7413063586 5.2025745222 1.5808199503  
H -1.812123043 4.9714962343 3.0675612107  
H -2.1136284853 -4.6070851558 3.9097531887  
H -3.5191698443 -6.5648915071 3.4619670087  
H -4.4495218812 -5.3335298266 4.3379450793  
H -4.6974923184 -5.5687145459 2.5999309364  
H -1.5302902621 -5.8517398 1.9992194595

H -1.3629474803 -4.1622772627 1.5064568523  
H -2.7487641076 -5.0999136471 0.9699175215  
H -4.3366665334 0.2446610919 6.1579136356  
H -2.3616085362 -0.0268259772 7.6312780622  
H -1.8602242785 0.169922354 5.9416058729  
H -1.827736548 -1.4298683359 6.6967000336  
H -4.5837200483 -1.1460360987 8.1907228716  
H -5.6261084316 -1.7583014796 6.8925933458  
H -4.1203270919 -2.595374782 7.2893665052  
H -5.2995454507 -0.8539183436 0.4567294762  
H -7.5097637845 0.1193208318 0.9840780223  
H -7.2890101216 -1.4320646732 1.8131211457  
H -7.1376062247 0.0812311896 2.7145084174  
H -5.0874905512 1.6749370126 2.1692373372  
H -5.5031740694 1.5912690979 0.4560708761  
H -3.8838558725 1.1143367789 0.9976262894

**NHMe<sub>2</sub>**

E° = -135.1241566; G° = -135.056727

Charge = 0; Multiplicity = 1;

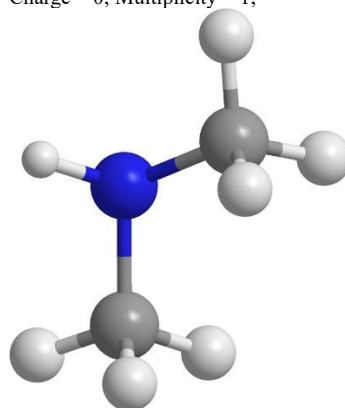

N -0.3297430941 0.1769425216 -0.4832298972  
C 0.733921066 0.9539061339 0.1249087302  
C -0.503966971 -1.1219265358 0.1391417381  
H -1.1999254713 0.6961314732 -0.4254172287  
H 1.6945298974 0.4550258188 -0.0498937295  
H 0.7873308602 1.9413853163 -0.3437513431  
H 0.6330726376 1.0957983873 1.2178029289  
H 0.3900230445 -1.7322131172 -0.0355726649  
H -0.6696545539 -1.0896175901 1.2328385269  
H -1.3507214154 -1.6424514081 -0.3187880608

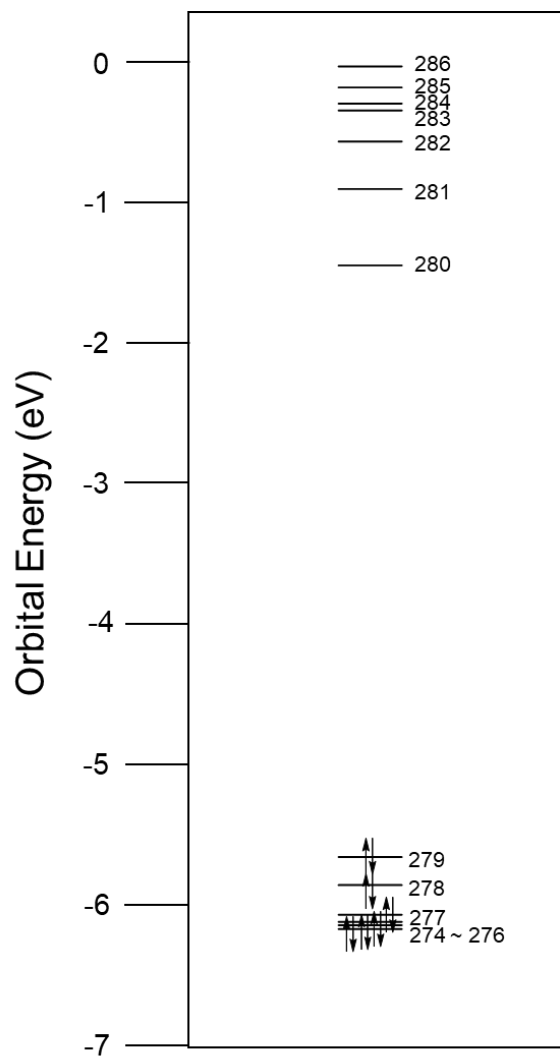

**Figure S13.** Computed orbital energies for **A**

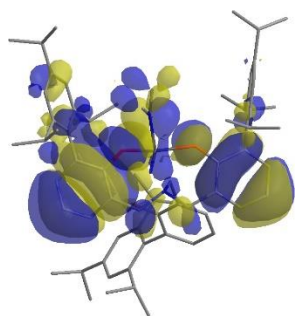

279

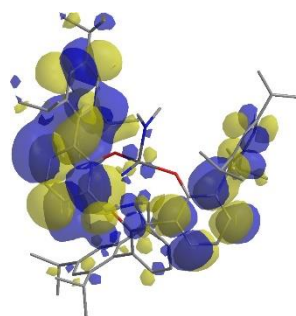

286

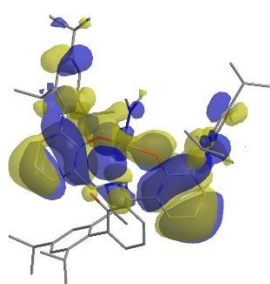

278

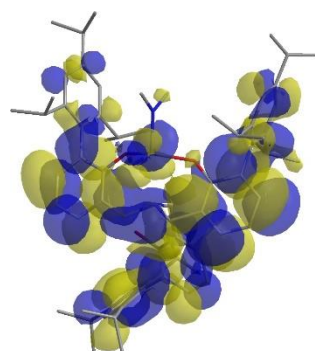

285

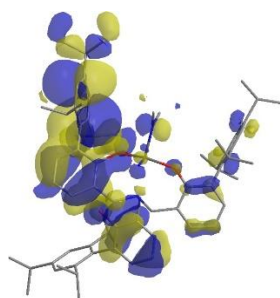

277

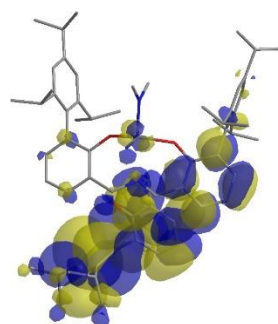

284

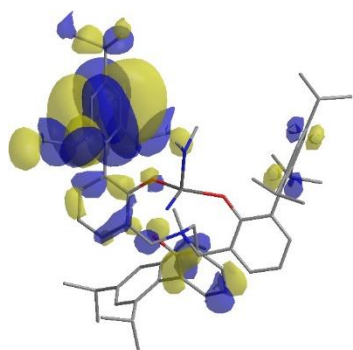

276

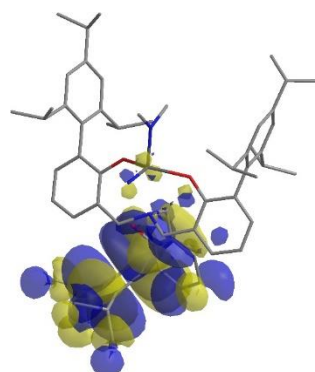

283

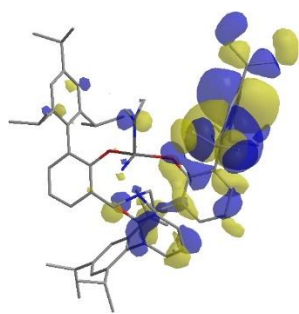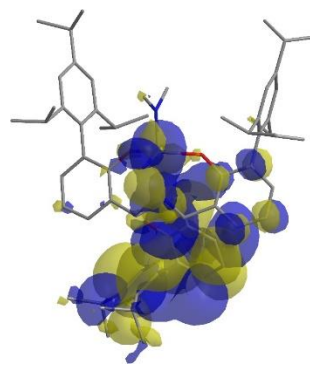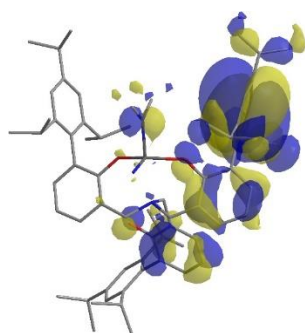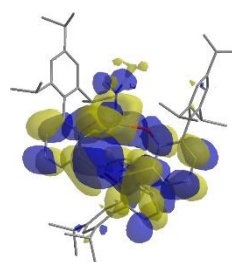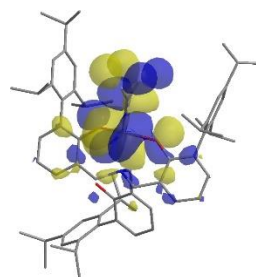

**Figure S14.** Computed frontier molecular orbitals of **A**

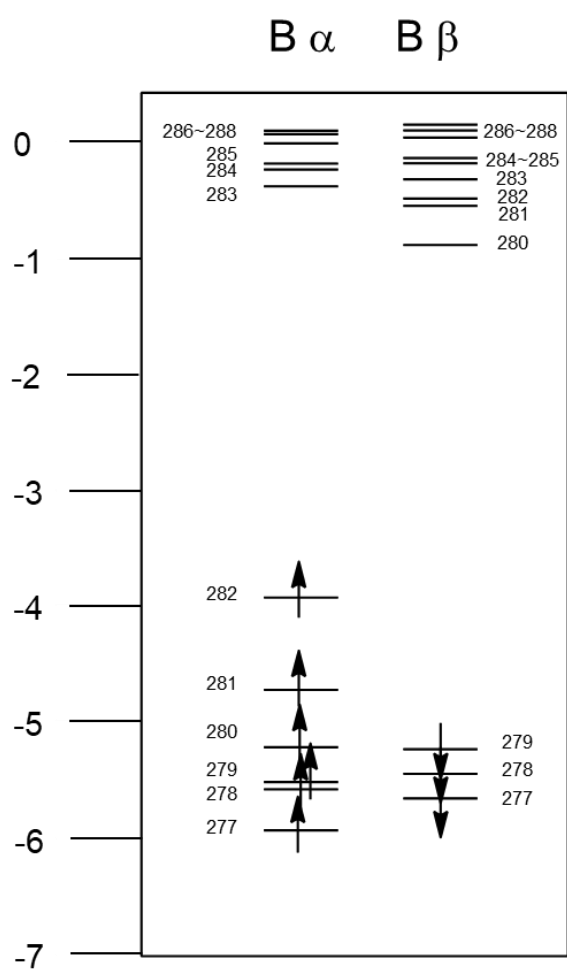

**Figure S15.** Computed orbital energies for **B**

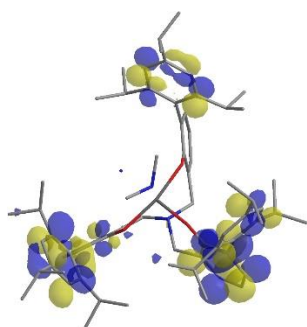

**288  $\alpha$**

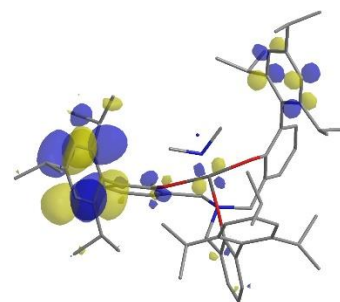

**288  $\beta$**

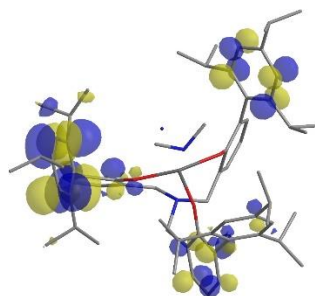

287  $\alpha$

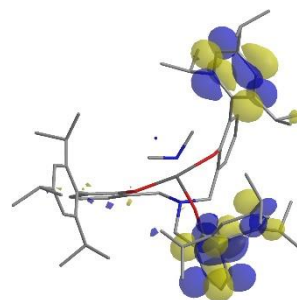

287  $\beta$

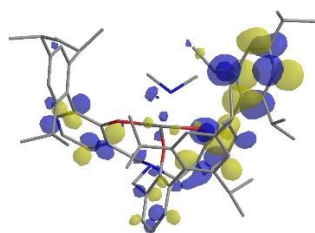

286  $\alpha$

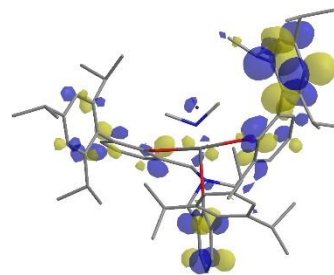

286  $\beta$

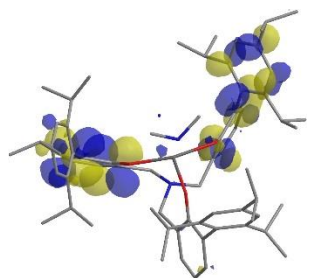

285  $\alpha$

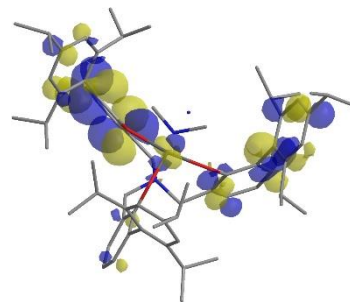

285  $\beta$

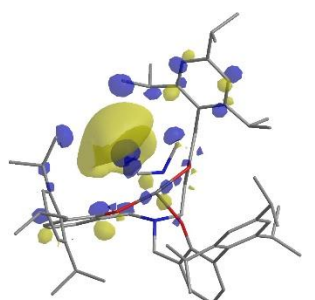

284  $\alpha$

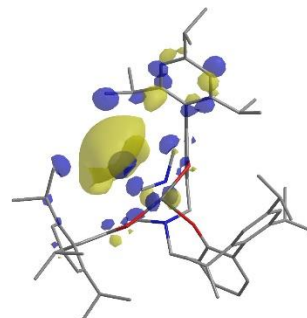

284  $\beta$

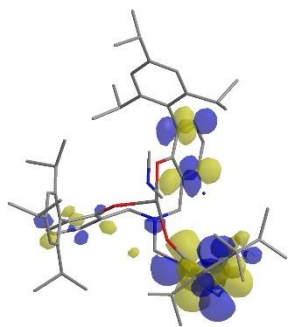

**283  $\alpha$**

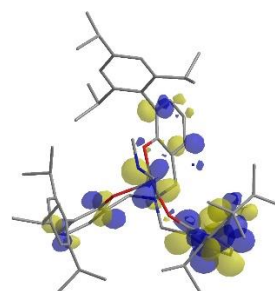

**283  $\beta$**

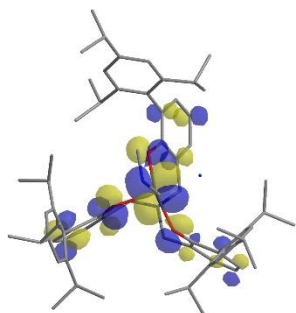

**282  $\alpha$**

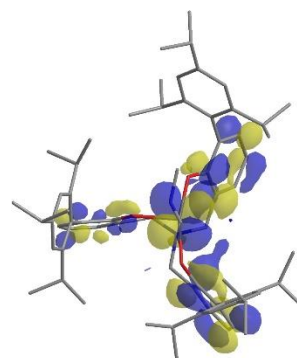

**282  $\beta$**

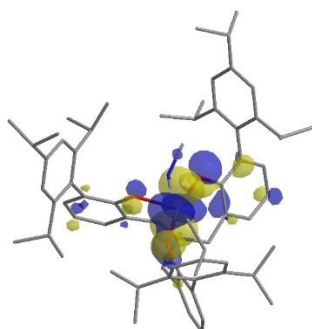

**281  $\alpha$**

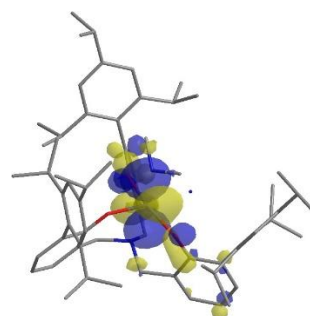

**281  $\beta$**

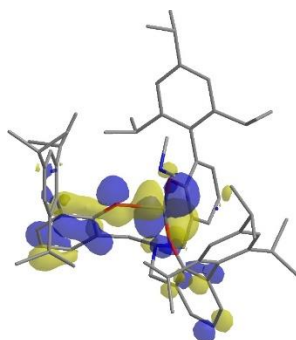

**280  $\alpha$**

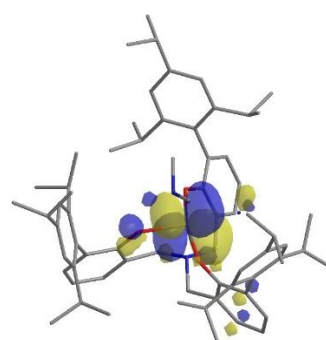

**280  $\beta$**

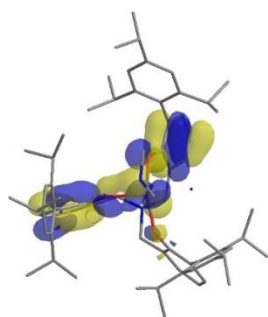

279  $\alpha$

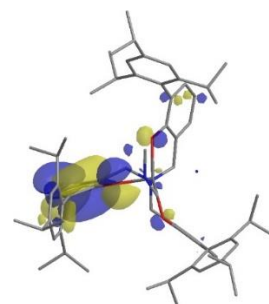

279  $\beta$

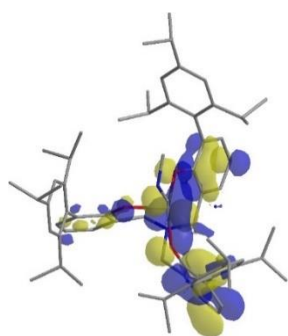

278  $\alpha$

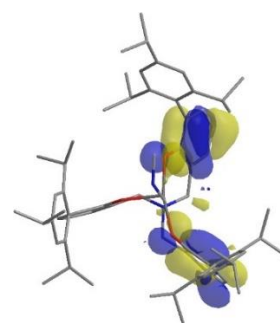

278  $\beta$

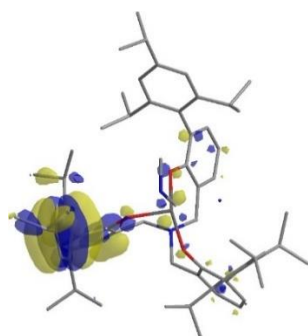

277  $\alpha$

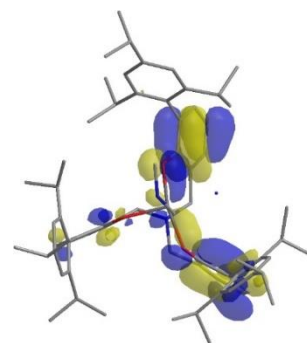

277  $\beta$

**Figure S16.** Computed frontier molecular orbitals of **B**



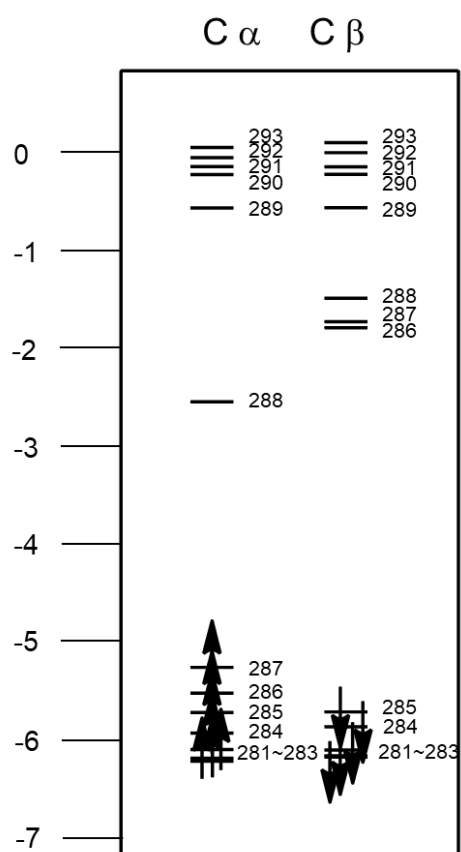

Figure S17. Computed orbital energies for C

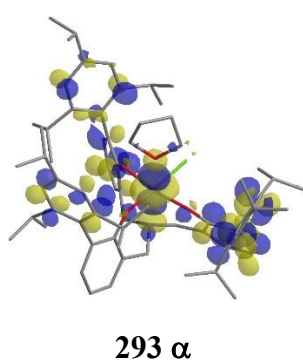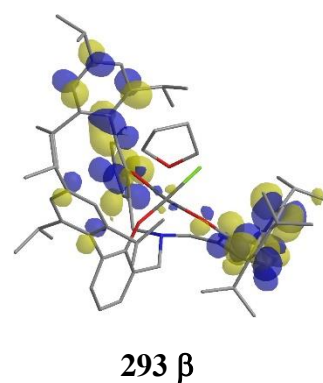

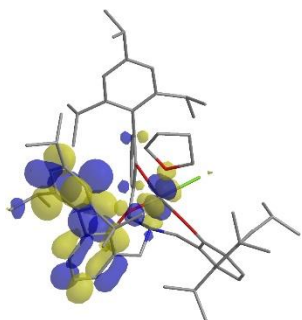

**292  $\alpha$**

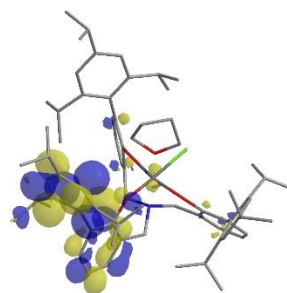

**292  $\beta$**

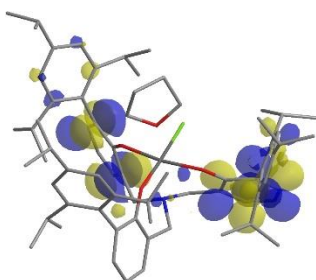

**291  $\alpha$**

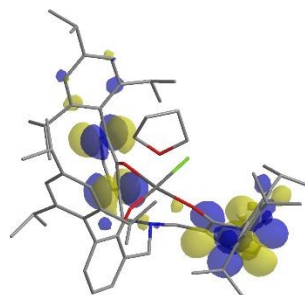

**291  $\beta$**

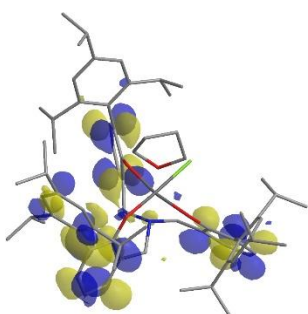

**290  $\alpha$**

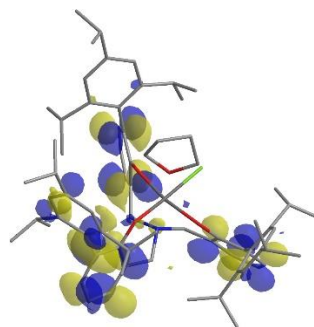

**290  $\beta$**

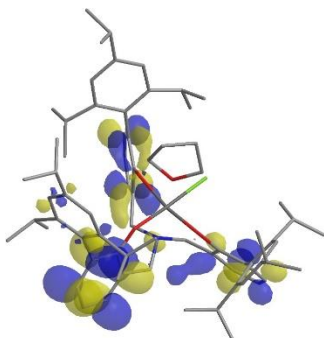

**289  $\alpha$**

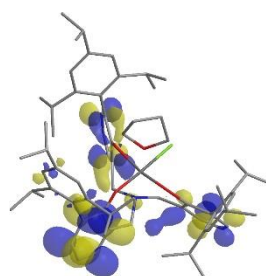

**289  $\beta$**

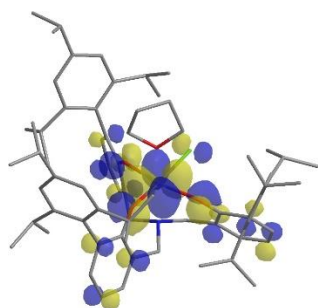

288  $\alpha$

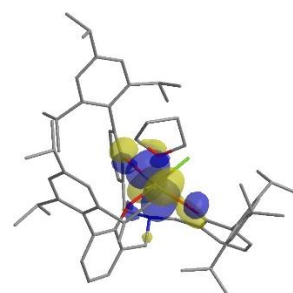

288  $\beta$

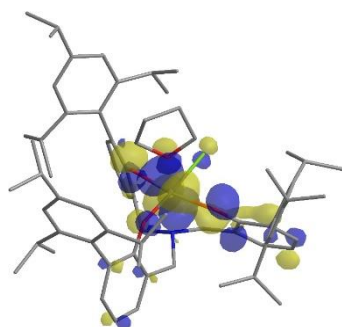

287  $\alpha$

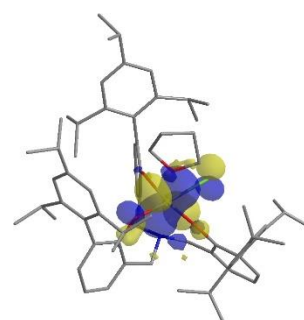

287  $\beta$

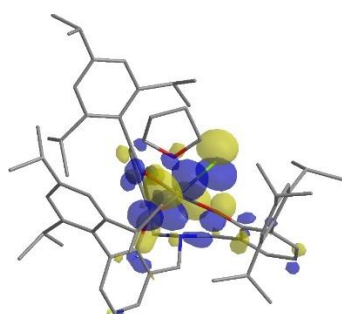

286  $\alpha$

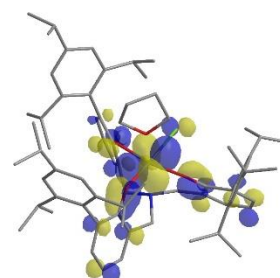

286  $\beta$

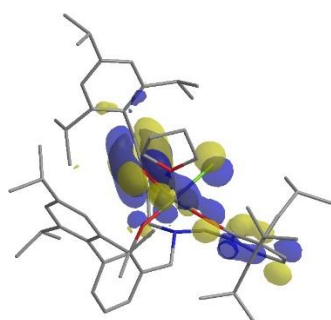

285  $\alpha$

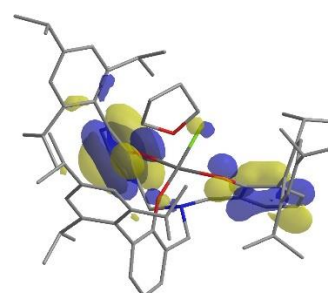

285  $\beta$

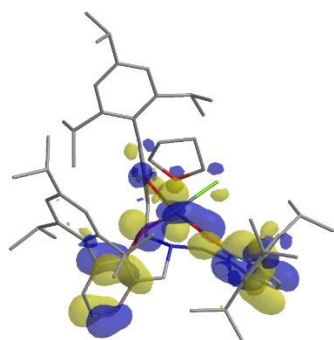

284  $\alpha$

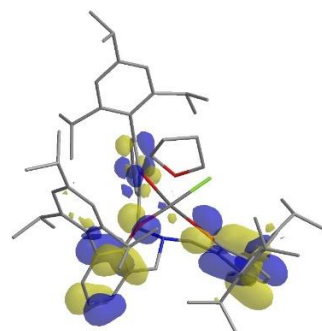

284  $\beta$

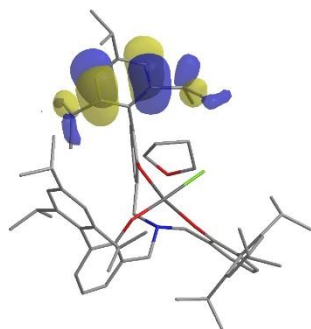

283  $\alpha$

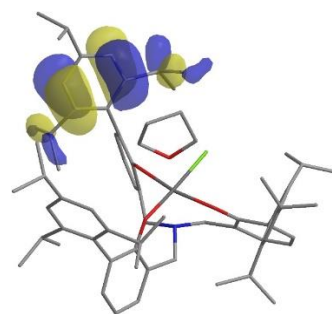

283  $\beta$

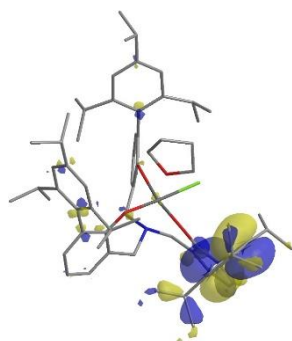

282  $\alpha$

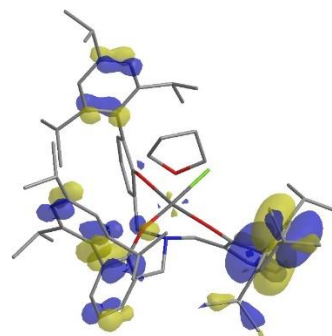

282  $\beta$

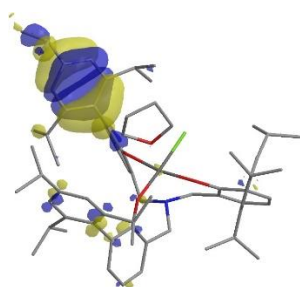

281  $\alpha$

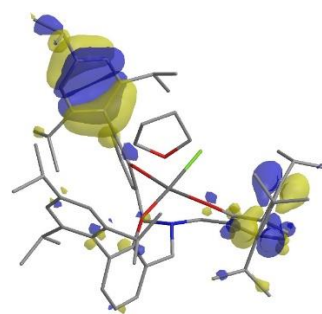

281  $\beta$

**Figure S3.** Computed frontier molecular orbitals of **C**

## Electron Paramagnetic Resonance (EPR) Data

EPR spectrum of **B** was recorded on a Bruker X-band A200 spectrometer at room temperature.

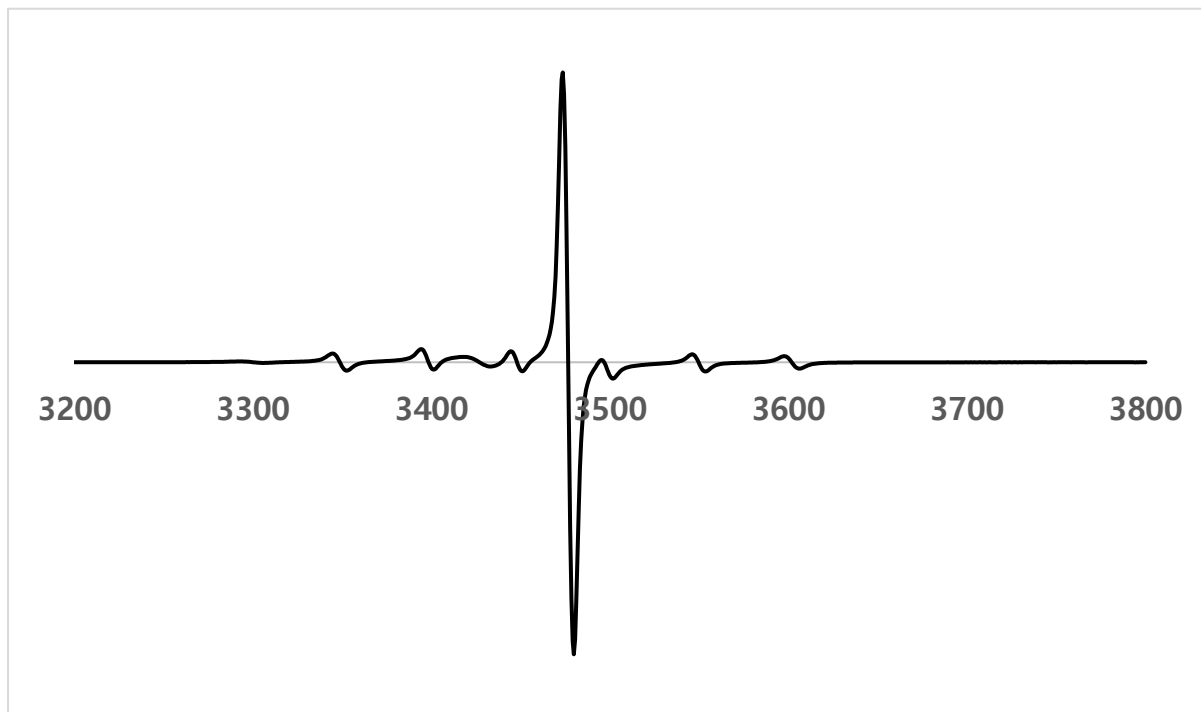

**Figure S4.** X-band of electron paramagnetic resonance of **B** in pentane.

# NMR Data

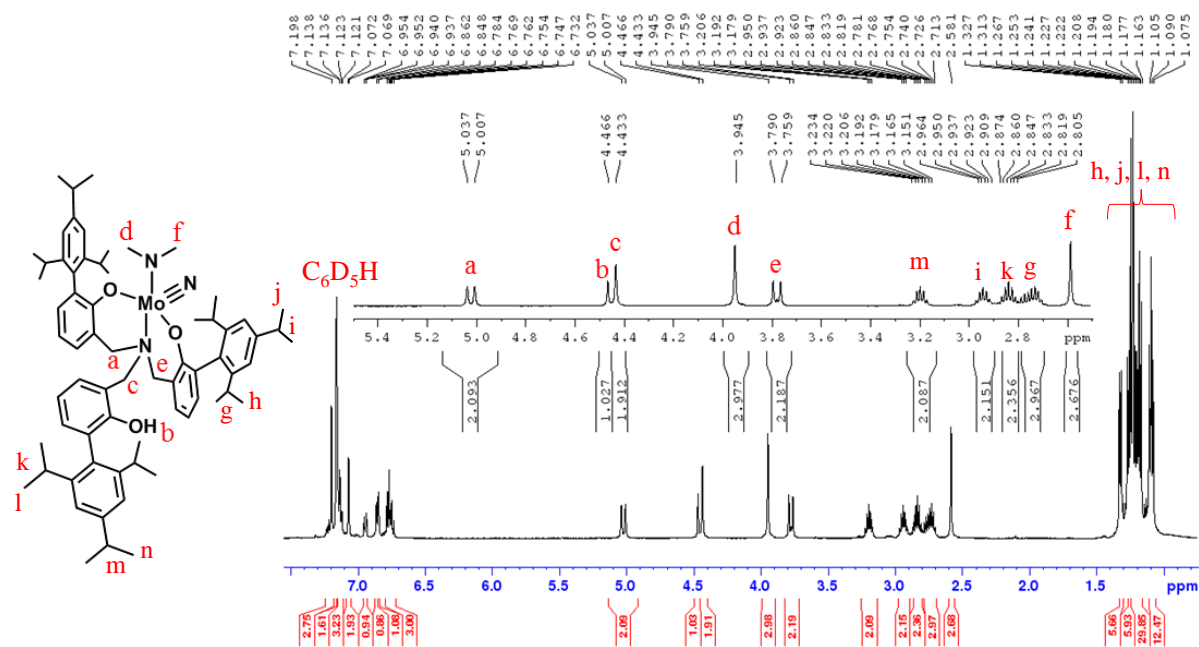

Figure S20. NMR Spectra of A.  $^1\text{H-NMR}$  in  $\text{C}_6\text{D}_6$ .

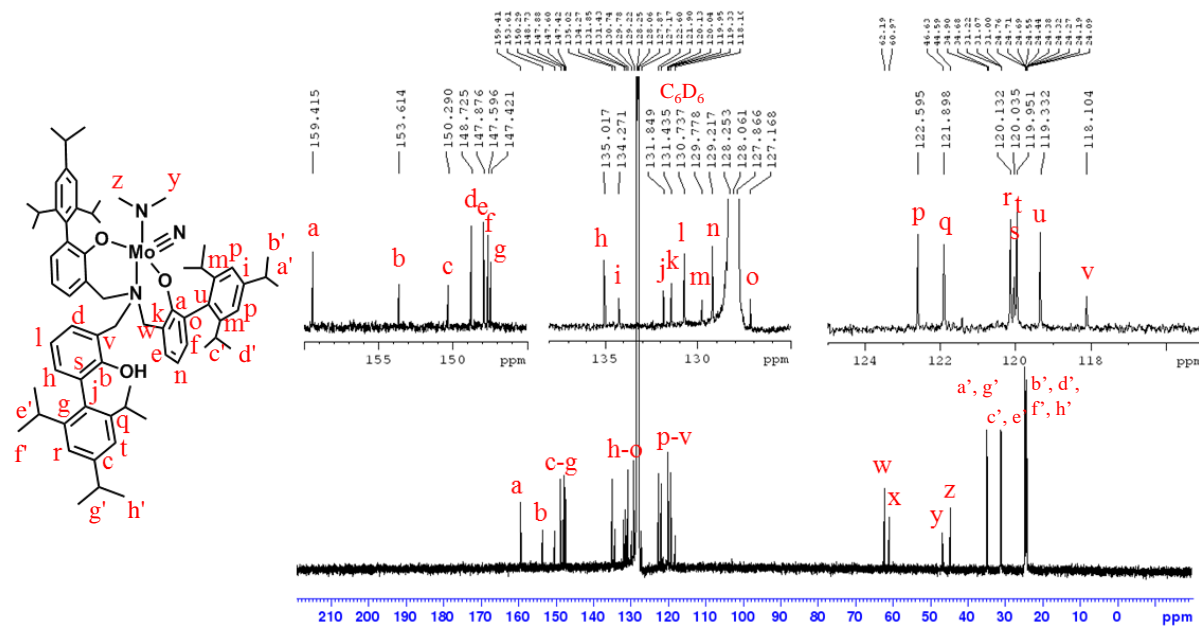

Figure S21. NMR Spectra of A.  $^{13}\text{C-NMR}$  in  $\text{C}_6\text{D}_6$ .

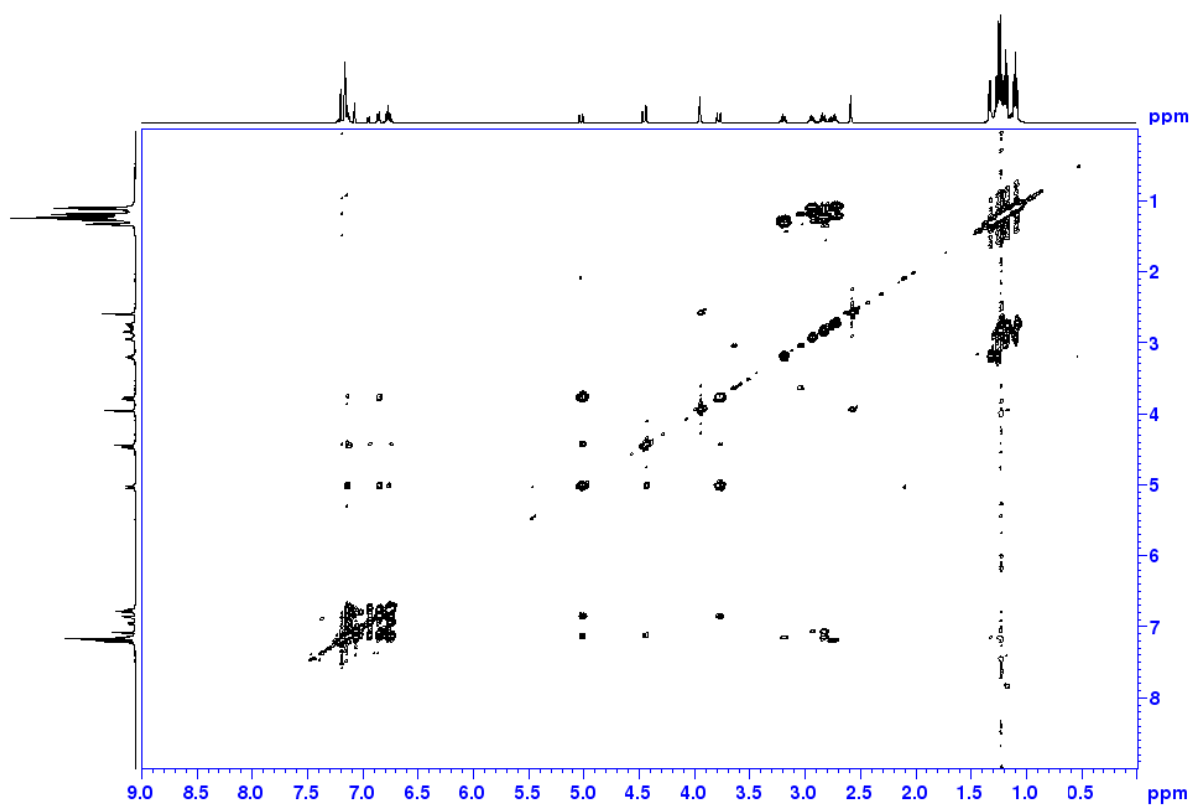

**Figure S22.** NMR Spectra of A.  $^1\text{H}$ - $^1\text{H}$  COSY NMR in  $\text{C}_6\text{D}_6$ .

## References

1. D. Y. Bae, G. S. Park, N. Ko, K. S. Son and E. Lee, *Dalton Trans.*, 2019, **48**, 9617-9624.
2. M. J. A. Johnson, P. M. Lee, A. L. Odom, W. M. Davis and C. C. Cummins, *Angew. Chem., Int. Ed. Engl.*, 1997, **36**, 87-91.
3. A. M. Thomas, B.-L. Lin, E. C. Wasinger and T. D. P. Stack, *J. Am. Chem. Soc.*, 2013, **135**, 18912-18919.
4. F. Stoffelbach, D. Saurens and R. Poli, *Eur. J. Inorg. Chem.*, 2001, **2001**, 2699-2703.
5. D. E. Bergbreiter and J. M. Killough, *J. Am. Chem. Soc.*, 1978, **100**, 2126-2134.
6. D. F. Evans, *J. Chem. Soc.*, 1959, DOI: 10.1039/JR9590002003, 2003-2005.
7. G. A. Bain and J. F. Berry, *J. Chem. Educ.*, 2008, **85**, 532.
8. M. J. Frisch *et al.*, *Gaussian 09, Revision A.02*, Gaussian, Inc., Wallingford CT, 2009.
9. A. D. Becke, *J. Chem. Phys.*, 1993, **98**, 5648-5652.
10. J. P. Perdew and Y. Wang, *Phys. Rev. B*, 1992, **45**, 13244-13249.
11. M. Dolg, U. Wedig, H. Stoll and H. Preuss, *J. Chem. Phys.*, 1987, **86**, 866-872.
12. A. W. Ehlers, M. Bohme, S. Dapprich, A. Gobbi, A. Hollwarth, V. Jonas, K. F. Kohler, R. Stegmann, A. Veldkamp and G. Frenking, *Chem. Phys. Lett.*, 1993, **208**, 111-114.
13. P. C. Hariharan and J. A. Pople, *Theor. Chim. Acta.*, 1973, **28**, 213-222.
